# Supplementary material
Source: publisher figshare collection journal article supplement (https://acs.figshare.com/ndownloader/files/4617697)
Supplement: Supplementary file 1 [file 4617697]

## Supporting Information for:

### Ruthenium-Catalyzed Hydroarylation of Methylenecyclopropanes: Mild C–H Bond Functionalization with Conservation of Cyclopropane Rings

Sergei I. Kozhushkov, Dmitry S. Yufit, and Lutz Ackermann\*

*Institut für Organische und Biomolekulare Chemie der Georg-August-Universität Göttingen,  
Tammannstrasse 2, 37077 Göttingen (Germany)*

*Department of Chemistry, University of Durham, Durham, South Rd., DH1 3LE (UK)*

*Lutz.Ackermann@chemie.uni-goettingen.de*

## Table of Contents

|                                                                                                                                         |         |
|-----------------------------------------------------------------------------------------------------------------------------------------|---------|
| Crystal Structure Analysis                                                                                                              | S1–S2   |
| Synthetic Procedures and Characterization Data                                                                                          | S3–12   |
| References and Notes                                                                                                                    | S12–S13 |
| <sup>1</sup> H and <sup>13</sup> C NMR) Spectra for all Newly Prepared Products and MS (ESI) Spectra for Selected Deuterated Compounds. | S14–S34 |

**Crystal Structure Analysis:** Crystals suitable for X-ray diffractometry of compounds **13b** and **14** were obtained by slow evaporation of their solutions in hexane/Et<sub>2</sub>O, crystals of compound **13a** –from MeOH/H<sub>2</sub>O. The single crystal X-ray data for compounds **13a,b** and **14** were collected on a Bruker SMART-CCD 6000 diffractometer ( $\omega$ -scan, 0.3°/frame) at 120.0(2)K using graphite monochromated Mo-K $\alpha$  radiation ( $\lambda$  = 0.71073 Å). All structures were solved by direct method and refined by full-matrix least squares on  $F^2$  for all data using SHELXTL software. All non-hydrogen atoms were refined with anisotropic displacement parameters, H-atoms were located on the difference map and refined isotropically.<sup>6</sup>

**Crystal data for 13a:** C<sub>17</sub>H<sub>17</sub>N ( $M$  = 235.32), monoclinic, space group  $C 2/c$ ,  $a$  = 26.4525(8),  $b$  = 7.1388(2),  $c$  = 14.1311(5) Å,  $\beta$  = 97.23(1)°,  $V$  = 2647.3(1) Å<sup>3</sup>,  $F(000)$  = 1008,  $Z$  = 8,  $D_c$  = 1.181 mg m<sup>-3</sup>,  $\mu$  = 0.07 mm<sup>-1</sup>. 15667 reflections ( $1.55 \leq \theta \leq 29.0^\circ$ ) were collected yielding 3521 unique data ( $R_{\text{merge}}$  = 0.082). Final  $wR_2(F^2)$  = 0.1496 for all data (231 refined parameters), conventional  $R(F)$  = 0.0483 for 2302 reflections with  $I \geq 2\sigma$ , GOF = 1.002.

**Crystal data for 13b:** C<sub>18</sub>H<sub>19</sub>NO ( $M$  = 265.34), monoclinic, space group  $P 2_1/n$ ,  $a$  = 9.5688(3),  $b$  = 14.4070(5),  $c$  = 10.4322(4) Å,  $\beta$  = 90.2170(10),  $V$  = 1438.15(9) Å<sup>3</sup>,  $F(000)$  =

568,  $Z = 4$ ,  $D_c = 1.225 \text{ mg m}^{-3}$ ,  $\mu = 0.075 \text{ mm}^{-1}$ . 16491 reflections ( $2.41 \leq \theta \leq 28.0^\circ$ ) were collected yielding 3486 unique data ( $R_{\text{merg}} = 0.0558$ . Final  $wR_2(F^2) = 0.0756$  for all data (257 refined parameters), conventional  $R(F) = 0.0366$  for 3486 reflections with  $I \geq 2\sigma$ , GOF = 1.012.

**Crystal data for 14:**  $\text{C}_{23}\text{H}_{25}\text{N}$  ( $M = 315.44$ ), monoclinic, space group  $C 2/c$ ,  $a = 26.601(2)$ ,  $b = 7.0525(5)$ ,  $c = 22.606(1) \text{ \AA}$ ,  $\beta = 121.03(1)^\circ$ ,  $V = 3634.0(4) \text{ \AA}^3$ ,  $F(000) = 1360$ ,  $Z = 8$ ,  $D_c = 1.153 \text{ mg m}^{-3}$ ,  $\mu = 0.07 \text{ mm}^{-1}$ . 17592 reflections ( $1.79 \leq \theta \leq 25.99^\circ$ ) were collected yielding 3568 unique data ( $R_{\text{merg}} = 0.131$ ). Final  $wR_2(F^2) = 0.1496$  for all data (317 refined parameters), conventional  $R(F) = 0.0547$  for 2143 reflections with  $I \geq 2\sigma$ , GOF = 0.980.

Molecules of **13a,b** and **14** do not contain any abnormal bond lengths. Short intramolecular C–H $\cdots$ N contacts between tertiary hydrogen atoms of bicyclopentyl moieties and nitrogen atoms of pyridine rings, which might be regarded as weak hydrogen bonds, were found in all molecules (2.543 in **13a**, 2.716 in **13b**, 2.447 and 2.704  $\text{\AA}$  in **14**, respectively). The conformations of these molecules in the crystals is a result of energetic compromises between these C–H $\cdots$ N closecontacts, conjugation effects, intramolecular van der Waals interactions between hydrogen atoms and crystal packing effects. Thus, the angles between planes of the pyridine and the benzene moieties in more sterically congested **13b** ( $79.4^\circ$ ) and **14** ( $71.7^\circ$ ) are bigger than in compound **13a** with just one bicyclopentyl fragment ( $55.1^\circ$ ), and the same holds true, but in less extent, for the angles between planes of the benzene ring and the adjacent three-membered ring of the bicyclopentyl core in **13b** ( $122.6^\circ$ ), in **14** ( $123.8$  and  $120.3^\circ$ ) and in **13a** ( $118.4^\circ$ ). The bicyclopentyl moieties in both compounds adopts typical<sup>7</sup> *gauche* (*synclinal*) conformation with dihedral angles between each two neighboring cyclopropanes of  $\varphi = 56.9$  and  $50.5^\circ$  (**14**) or  $\varphi = -60.1^\circ$  (**13a**) and  $-52.7^\circ$  (**13b**). Broadening of methylene carbons signals in  $^{13}\text{C}$  NMR spectrum of the compound **14** (see below) indicates the increased rotation barrier for bicyclopentyl moieties in the solution as well. In all crystal structures the molecules are linked by a number of C–H $\cdots$  $\pi$  interactions between aromatic rings and various C–H fragments with the shortest C–H $\cdots$ C distances of 2.764, 2.941 and 2.779  $\text{\AA}$  in **13a**, **13b** and **14**, respectively.

**Synthetic Procedures and Characterization Data. General aspects:** 2-Phenylmethylenecyclopropane (**2**),<sup>1</sup> bicyclopropylidene (**12**),<sup>2</sup> methylenespiropentane (**23**),<sup>3</sup> and  $[\text{RuCl}_2(\text{cod})]_n$ <sup>4</sup> were prepared according to previously published procedures. 2-(Pentadeuteriophenyl)pyridine (**1a**-[D<sub>5</sub>]) was synthesized from C<sub>6</sub>D<sub>6</sub> as indicated below adopting previously published procedures.<sup>5</sup> All other chemicals were used as commercially available. All operations in anhydrous solvents were performed under argon in flame-dried glassware. THF and 1,4-dioxane were dried by distillation from sodium benzophenone ketyl, NMP and DMF –from CaH<sub>2</sub>. Organic extracts were dried over MgSO<sub>4</sub>. TLC analyses were performed on precoated sheets, 0.25 mm Sil G/UV<sub>254</sub> (Macherey-Nagel). Silica gel grade 60 (230–400 mesh) (Merck) was used for column chromatography. NMR spectra of solutions in CDCl<sub>3</sub> were recorded on a Bruker AM 250 (250 MHz for <sup>1</sup>H and 62.9 MHz for <sup>13</sup>C NMR) instrument. Multiplicities were determined by DEPT (Distortionless Enhancement by Polarization Transfer) measurements. Chemical shifts refer to  $\delta_{\text{TMS}} = 0.00$  according to the chemical shifts of residual CHCl<sub>3</sub> signals.

**Synthesis of 2-(pentadeuteriophenyl)pyridine (**1a**-[D<sub>5</sub>]).**

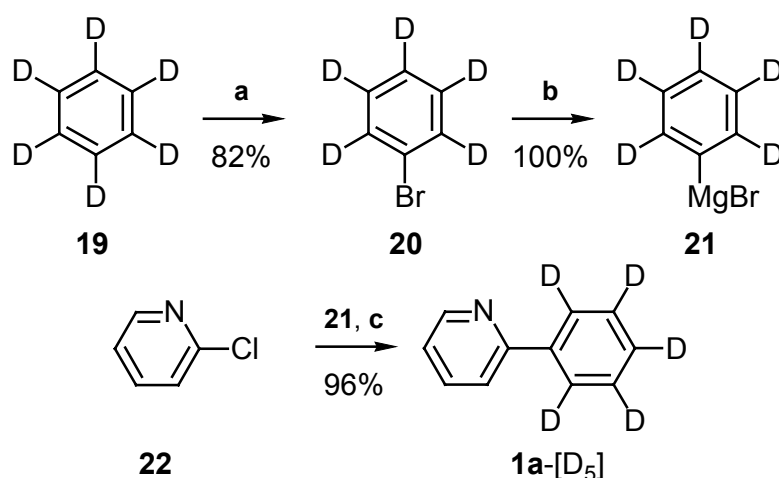

**Scheme 1.** Synthesis of 2-(pentadeuteriophenyl)pyridine (**1a**-[D<sub>5</sub>]). Reagents and conditions: a) NaBrO<sub>3</sub>, H<sub>2</sub>SO<sub>4</sub>, H<sub>2</sub>O, 0–20 °C, 12 h; b) Mg, THF, 20–65 °C, 2 h; c) Pd(dba)<sub>2</sub> (5 mol%), dppf (5 mol%), THF, –40 to 20 °C, 12 h.

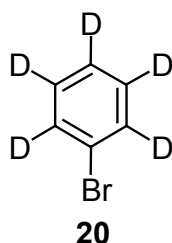

**1-Bromopentadeuteriobenzene (20)** was prepared adopting a published procedure<sup>5a</sup> and using NaBrO<sub>3</sub> instead of KBrO<sub>3</sub>. To a vigorously stirred solution of sulfuric acid (16.65 g, 9.05 mL) in H<sub>2</sub>O (33.3 mL), deuteriobenzene (**19**) (4.21 g, 4.43 mL, 50 mmol) was added in one portion

at 0 °C. Thereafter, NaBrO<sub>3</sub> (8.299 g, 55.0 mmol) was added in two portions with an interval of 1 h at the same temperature. The reaction mixture was stirred for an additional 10 h at ambient temperature, poured into ice-cold water (100 mL) and extracted with *n*-pentane (3 × 40 mL). The combined extracts were washed with ice-cold water (2 × 50 mL), sat. aq. NaHCO<sub>3</sub> solution (2 × 50 mL), brine (40 mL), and dried. *n*-Pentane was carefully evaporated through a 40 × 2-cm column packed with glass helices, and the residue was "bulb-to-bulb" distilled at 45 °C (0.1 Torr) into a cold (−78 °C) trap to give 6.614 g (82%) of pure **20** as a colorless liquid. <sup>1</sup>H NMR (250 MHz, CDCl<sub>3</sub>): no signals; <sup>13</sup>C NMR (62.9 MHz, CDCl<sub>3</sub>): δ = 131.0 (t, *J* = 25.3 Hz, 2 CD), 129.4 (t, *J* = 24.5 Hz, 2 CD), 126.3 (t, *J* = 24.5 Hz, CD), 122.2 ppm (CBr).

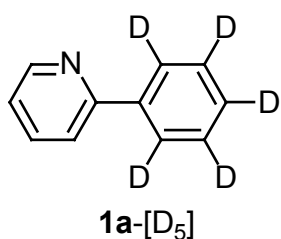

**2-(Pentadeuteriophenyl)pyridine (1a-[D<sub>5</sub>]):**<sup>5b</sup> Grignard reagent **21** was prepared from **20** (6.0 g, 37.03 mmol) and magnesium turnings (960 mg, 40 mmol) in anhydrous THF (30 mL) in virtually quantitative yield (20–65 °C, 2 h). A second flask was charged with Pd(dba)<sub>2</sub><sup>8</sup> (725 mg, 1.25 mmol, 5 mol%), dppf (675 mg, 1.25 mmol, 5 mol%), anhydrous THF (75 mL), and the resulting mixture was stirred at ambient temperature for 20 min. 2-Chloropyridine (**22**) (2.838 g, 2.35 mL, 25.0 mmol) was added in one portion, the reaction mixture was stirred at ambient temperature for 0.5 h and cooled to −40 °C. Under stirring, the Grignard reagent **21** was added dropwise via syringe at this temperature over a period of 1 h, the reaction mixture was stirred for an additional 11 h at ambient temperature, poured into ice-cold mixture of sat. aq. NH<sub>4</sub>Cl solution (100 mL) with sat. aq. NH<sub>4</sub>OH solution (10 mL) and extracted with diethyl ether (3 × 60 mL). The combined extracts were washed with brine (50 mL), dried and concentrated under reduced pressure. Column chromatography of the residue (6.650 g) on silica gel (180 g of silica gel, column 35 × 4 cm, hexane/Et<sub>2</sub>O 5:2, *R<sub>f</sub>* = 0.28) afforded **1a-[D<sub>5</sub>]** (3.851 g, 96%) as a slightly yellow oil, <sup>1</sup>H NMR (250 MHz, CDCl<sub>3</sub>): δ = 8.70 (ddd, *J* = 0.3, 1.4, 4.8 Hz, 1 H; Py-H), 7.80–7.71 (m, 2 H; Py-H), 7.25–7.21 ppm (m, 1 H; Py-H); <sup>13</sup>C NMR (62.9 MHz, CDCl<sub>3</sub>): δ = 156.9 (C), 149.2 (CH), 138.8 (C), 136.3 (CH), 128.0 (t, *J* = 24.0 Hz, CD), 127.8 (t, *J* = 24.5 Hz, 2 CD), 126.1 (t, *J* = 24.5 Hz, 2 CD), 121.7 (CH), 120.1 ppm (CH); HRMS calcd for C<sub>11</sub>H<sub>4</sub>D<sub>5</sub>N: (*M* + 1)<sup>+</sup> = 161.1127; found: 161.1122.

## Ruthenium-catalyzed hydroarylation of methylenecyclopropanes **2** and **12** with 2-phenylpyridines **1a**, **1b**, and **1a**-[D<sub>5</sub>] General procedure (GP) 1

A flame-dried 10-mL Schlenk flask was cooled under argon and charged with respective arene derivative **1a**, **b**, or **1a**-[D<sub>5</sub>] (1–2 mmol) in anhydrous dioxane (3 mL), [RuCl<sub>2</sub>(cod)]<sub>n</sub> (5 mol%) and L (10 mol%). After stirring at ambient temperature for 0.5 h, alkene **2** or **14** was added in three equal portions (16, and 32 h), while the reaction mixture was stirred for 48 h at 120 °C. After cooling to ambient temperature, the reaction mixture was poured into sat. aq. NaHCO<sub>3</sub> solution (50 mL) and extracted with Et<sub>2</sub>O (3 × 40 mL). The combined extracts were washed with brine (40 mL), dried and concentrated under reduced pressure. The products were isolated by column chromatography of the residue on silica gel (50 g of silica gel, column 25 × 2.5 cm, hexane/Et<sub>2</sub>O 20:1→5:1 for **1a** or 20:1→5:2 for **1b**).

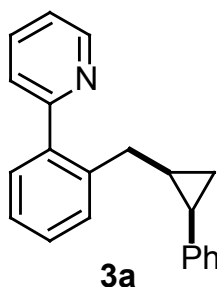

### 2-{[2-(*cis*-2-Phenylcyclopropyl)methyl]phenyl}pyridine (**3a**):

- a) Column chromatography of the residue obtained from 2-phenylpyridine (**1a**), (225.0 mg, 1.45 mmol), **2** (566.2 mg, 596 μL, 4.35 mmol), [RuCl<sub>2</sub>(cod)]<sub>n</sub> (20.3 mg, 72.5 μmol) and dicyclohexyl-(2',4',6'-triisopropylbiphenyl-2-yl)phosphane (**11**) (69.1 mg, 0.145 mmol) in anhydrous dioxane (3 mL) according to GP1 afforded recovered **1** (86.9 mg, 39%, *R*<sub>f</sub> = 0.16 in hexane/Et<sub>2</sub>O 5:1) and **3** (219.4 mg, 53%, *R*<sub>f</sub> = 0.10 in hexane/Et<sub>2</sub>O 5:1) as slightly yellow oils; <sup>1</sup>H NMR (250 MHz, CDCl<sub>3</sub>): δ = 8.65 (ddd, *J* = 0.8, 1.5, 4.8 Hz, 1 H; Py-H), 7.70 (td, *J* = 1.8, 7.8 Hz, 1 H; Ar-H), 7.32–7.14 (m, 9 H; Ar-H), 7.06 (d, *J* = 1.8, 4.3 Hz, 2 H; Ph-H), 2.56 (dd, *J* = 6.0, 15.0 Hz, 1 H; CH<sub>2</sub>), 2.32 (dd, *J* = 8.3, 15.0 Hz, 1 H; CH<sub>2</sub>), 2.12 (ddd, *J* = 5.8, 8.5, 8.8 Hz, 1 H; cPr-CH), 1.31–1.18 (m, 1 H; cPr-CH), 0.89 (ddd, *J* = 5.3, 8.5, 8.5 Hz, 1 H; cPr-CH<sub>2</sub>), 0.59 ppm (ddd, *J* = 5.3, 5.8, 8.5 Hz, 1 H; cPr-CH<sub>2</sub>); <sup>13</sup>C NMR (62.9 MHz, CDCl<sub>3</sub>): δ = 160.1 (C), 148.9 (CH), 140.2 (C), 139.8 (C), 139.0 (C), 135.9 (CH), 129.6 (CH), 129.5 (CH), 128.7 (2 CH), 128.1 (CH), 127.7 (2 CH), 125.7 (CH), 125.5 (CH), 124.1 (CH), 121.4 (CH), 31.1 (CH<sub>2</sub>), 21.4 (CH), 20.1 (CH), 9.6 ppm (CH<sub>2</sub>); HRMS calcd for C<sub>21</sub>H<sub>19</sub>N: (*M* + 1)<sup>+</sup> = 286.1491; found: 286.1488.
- b) Column chromatography of the residue obtained from **1a** (182.0 mg, 1.173 mmol), **2** (458.1 mg, 482.2 μL, 3.519 mmol), [RuCl<sub>2</sub>(cod)]<sub>n</sub> (16.4 mg, 58.6 μmol) and P(*o*-biphenyl)(*t*Bu)<sub>2</sub> (**10**) (35.0 mg, 0.1173 mmol) in anhydrous dioxane (3 mL) according to GP1 afforded recovered **1a** (96.5 mg, 53%) and **3a** (152.8 mg, 46%) as slightly yellow oils.
- c) Column chromatography of the residue obtained from **1a** (303.9 mg, 1.958 mmol), **2** (382.3

mg, 402  $\mu$ L, 2.937 mmol), [RuCl<sub>2</sub>(cod)]<sub>n</sub> (27.8 mg, 100  $\mu$ mol) and dicyclohexyl-(2',4',6'-triisopropylbiphenyl-2-yl)phosphane (**11**) (95.3 mg, 0.2 mmol) in anhydrous NMP (3 mL) according to GP1 afforded recovered **1a** (121.78 mg, 40%) and **3a** (301.5 mg, 54%) as slightly yellow oils.

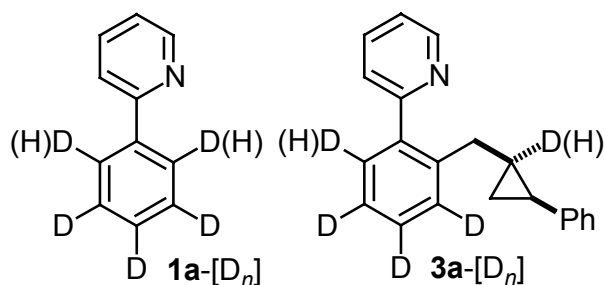

**Oligodeuterio-2-{[2-(*cis*-2-phenylcyclopropyl)methyl]phenyl}pyridine (**3a-[D<sub>n</sub>]**) and **1a-[D<sub>4</sub>]**:**

a) Column chromatography of the residue obtained from **1a-[D<sub>5</sub>]** (189.6 mg, 1.183 mmol), **2** (616.1 mg, 648.5  $\mu$ L, 4.733 mmol),

[RuCl<sub>2</sub>(cod)]<sub>n</sub> (16.5 mg, 59.1  $\mu$ mol) and P(*o*-biphenyl)(*t*Bu)<sub>2</sub> (**10**) (33.5 mg, 0.118 mmol) in anhydrous dioxane (3 mL) according to GP1 (48 h heating) afforded **1a-[D<sub>4</sub>]** (45.1 mg, 24%, *R<sub>f</sub>* = 0.16 in hexane/Et<sub>2</sub>O 5:1) and **3a-[D<sub>n</sub>]** (221.1 mg, 65%, *R<sub>f</sub>* = 0.10 in hexane/Et<sub>2</sub>O 5:1) as slightly yellow oils. **1a-[D<sub>4</sub>]**: <sup>1</sup>H NMR (250 MHz, CDCl<sub>3</sub>):  $\delta$  = 8.70 (dt, *J* = 1.3, 4.8 Hz, 1 H; Py-H), 7.99 (s, 1 H; Ph-H), 7.80–7.71 (m, 2 H; Py-H), 7.25–7.20 ppm (m, 1 H; Py-H); <sup>13</sup>C NMR (62.9 MHz, CDCl<sub>3</sub>):  $\delta$  = 157.4 (C), 149.6 (CH), 139.2 (C), 136.7 (CH), 128.7 (t, *J* = 24.5 Hz, CD), 128.3 (t, *J* = 24.5 Hz, CD), 128.1 (t, *J* = 24.5 Hz, CD), 126.7 (CH), 126.1 (t, *J* = 24.5 Hz, 2 CD), 122.0 (CH), 120.5 ppm (CH); MS (ESI): *m/z*: 160.2 (100) [*M*+1]<sup>+</sup>. **3a-[D<sub>n</sub>]**: MS (ESI): mixture of three components: **3a-[D<sub>5</sub>]** (C<sub>21</sub>H<sub>14</sub>D<sub>5</sub>N, *m/z*: 291.19, [*M*+1]<sup>+</sup>, 47%), **3a-[D<sub>4</sub>]** (C<sub>21</sub>H<sub>15</sub>D<sub>4</sub>N, *m/z*: 290.18, [*M*+1]<sup>+</sup>, 36%), and **3-[D<sub>3</sub>]** (C<sub>21</sub>H<sub>16</sub>D<sub>3</sub>N, *m/z*: 291.19, [*M*+1]<sup>+</sup>, 17%). This is in line with the relative intensity of the resonance of cyclopropane CH moiety in the <sup>1</sup>H NMR spectrum. <sup>1</sup>H NMR (250 MHz, CDCl<sub>3</sub>; **3a-[D<sub>n</sub>]**):  $\delta$  = 8.65 (dm, *J* = 4.8 Hz, 1 H; Py-H), 7.70 (td, *J* = 1.8, 7.8 Hz, 1 H; Ar-H), 7.32–7.14 (m, ca. 5.2 H; Ar-H), 7.06 (d, *J* = 1.8, 4.3 Hz, 2 H; Ph-H), 2.56 (dm, *J* = 15.0 Hz, 1 H; CH<sub>2</sub>), 2.32 (dm, *J* = 15.0 Hz, 1 H; CH<sub>2</sub>), 2.17–2.08 (m, 1 H; cPr-CH), 1.31–1.18 (m, ca. 0.5 H; cPr-CH and cPr-CD), 0.95–0.85 (m, Hz, 1 H; cPr-CH<sub>2</sub>), 0.63–0.57 ppm (m, 1 H; cPr-CH<sub>2</sub>); <sup>13</sup>C NMR (62.9 MHz, CDCl<sub>3</sub>; major component **3a-[D<sub>5</sub>]**):  $\delta$  = 160.0 (C), 148.9 (CH), 140.0 (C), 139.7 (C), 138.9 (C), 135.9 (CH), 128.8 (2 CH), 127.6 (2 CH), 125.4 (CH), 124.0 (CH), 121.4 (CH), 30.8 (CH<sub>2</sub>), 21.2 (CH), 19.8 (m, CD), 9.4 ppm (CH<sub>2</sub>). Triplets of four CD fragment are overlapped between 129 and 126 ppm. <sup>13</sup>C NMR (62.9 MHz, CDCl<sub>3</sub>; clearly observable signals of the second major component **3-[D<sub>4</sub>]**):  $\delta$  = 31.0 (CH<sub>2</sub>), 21.3 (CH), 20.1 (CH), 9.5 ppm (CH<sub>2</sub>).

b) Column chromatography of the residue obtained from **1a-[D<sub>5</sub>]** (239.2 mg, 1.493 mmol), **2**

(291.5 mg, 306.8  $\mu$ L, 2.239 mmol),  $[\text{RuCl}_2(\text{cod})]_n$  (20.9 mg, 74.6  $\mu$ mol) and dicyclohexyl-(2',4',6'-triisopropylbiphenyl-2-yl)phosphane (**11**) (71.2 mg, 0.149 mmol) in anhydrous dioxane (3 mL) according to GP1 (12 h heating) afforded **1a**-[D<sub>n</sub>] (132.8 mg, 56%) and **3a**-[D<sub>n</sub>] (108.5 mg, 25%) as slightly yellow oils. In this experiment, however, **1a**-[D<sub>n</sub>] contained only 0.46 H in both *ortho*-positions and, according to its MS (ESI) spectra, was a mixture of **1a**-[D<sub>5</sub>] (54%), **1a**-[D<sub>4</sub>] (34%) and **1a**-[D<sub>3</sub>] (12%).

c) Column chromatography of the residue obtained from **1a** (237.5 mg, 1.530 mmol), **2** (597.6 mg, 529.0  $\mu$ L, 4.591 mmol),  $[\text{RuCl}_2(\text{cod})]_n$  (21.4 mg, 76.5  $\mu$ mol) and dicyclohexyl-(2',4',6'-triisopropylbiphenyl-2-yl)phosphane (**11**) (72.9 mg, 0.153 mmol) in anhydrous DMF-[D<sub>7</sub>] according to GP1 (48 h heating) afforded **1a** (71.1 mg, 30%) and **3a** (236.0 mg, 54%) as slightly yellow oils. Neither **1a** nor **3a** contained deuterium label.

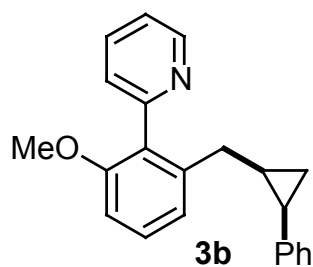

**2-([2-Methoxy-6-(*cis*-2-phenylcyclopropyl)methyl]phenyl)pyridine (**3b**):** Column chromatography of the residue obtained from 2-(2-methoxyphenyl)pyridine (**1b**), (299.4 mg, 1.616 mmol), **2** (315.6 mg, 332.2  $\mu$ L, 2.425 mmol),  $[\text{RuCl}_2(\text{cod})]_n$  (22.6 mg, 80.8  $\mu$ mol) and dicyclohexyl-(2',4',6'-triisopropylbiphenyl-2-yl)phosphane (**11**) (77.0 mg, 0.162

mmol) in anhydrous dioxane (3 mL) according to GP1 afforded recovered **1b** (53.9 mg, 18%,  $R_f$  = 0.15 in hexane/Et<sub>2</sub>O 5:2) and **3a** (399.5 mg, 78%,  $R_f$  = 0.10 in hexane/Et<sub>2</sub>O 5:2) as slightly yellow oils; <sup>1</sup>H NMR (250 MHz, CDCl<sub>3</sub>):  $\delta$  = 8.68 (dq,  $J$  = 0.9, 5.0 Hz, 1 H; Py-H), 7.69 (td,  $J$  = 1.8, 7.6 Hz, 1 H; Py-H), 7.33–7.08 (m, 6 H; Ar-H), 6.99 (dm,  $J$  = 8.0 Hz, 2 H; Ph-H), 6.81 (dd,  $J$  = 1.3, 8.8 Hz, 2 H; Ph-H), 2.28 (dd,  $J$  = 6.0, 15.0 Hz, 1 H; CH<sub>2</sub>), 2.09 (ddd,  $J$  = 6.1, 8.5, 8.5 Hz, 1 H; cPr-CH), 1.93 (dd,  $J$  = 8.8, 15.0 Hz, 1 H; CH<sub>2</sub>), 1.29–1.18 (m, 1 H; cPr-CH), 0.88 (ddd,  $J$  = 6.0, 7.5, 8.5 Hz, 1 H; cPr-CH<sub>2</sub>), 0.56 ppm (q,  $J$  = 6.0 Hz, 1 H; cPr-CH<sub>2</sub>); <sup>13</sup>C NMR (62.9 MHz, CDCl<sub>3</sub>):  $\delta$  = 156.9 (C), 156.7 (C), 149.1 (CH), 141.8 (C), 138.9 (C), 135.5 (CH), 129.4 (C), 128.7 (CH), 128.6 (2 CH), 127.6 (2 CH), 121.5 (CH), 121.4 (CH), 108.3 (CH), 55.5 (OCH<sub>3</sub>), 31.1 (CH<sub>2</sub>), 21.3 (CH), 19.8 (CH), 9.5 ppm (CH<sub>2</sub>); HRMS calcd for C<sub>22</sub>H<sub>21</sub>NO: (M + 1)<sup>+</sup> = 316.1623; found: 316.1618.

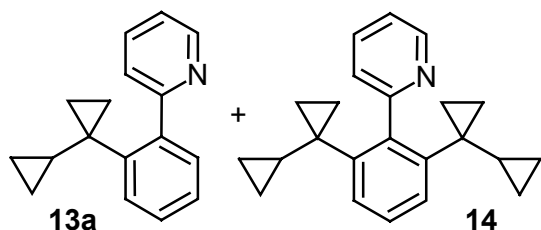

**2-[(2-Bicyclopropyl-1-yl)phenyl]pyridine (13a) and 2-[2,6-bis(bicyclopropyl-1-yl)phenyl]pyridine (14):** a) Column chromatography of the residue obtained from **1a** (187.0 mg, 1.205 mmol), bicyclopropylidene (**12**) (289.6 mg, 339.2  $\mu$ L, 3.615 mmol),

[RuCl<sub>2</sub>(cod)]<sub>n</sub> (16.9 mg, 60.2  $\mu$ mol) and dicyclohexyl-(2',4',6'-triisopropylbiphenyl-2-yl)phosphane (**11**) (57.4 mg, 0.1205 mmol) according to GP1 (48 h heating) afforded **14** (226.8 mg, 60%, *R<sub>f</sub>* = 0.30 in hexane/Et<sub>2</sub>O 5:1) and **13a** (94.4 mg, 33%, *R<sub>f</sub>* = 0.13 in hexane/Et<sub>2</sub>O 5:1) as slightly yellow oils. Compounds **13a** and **14** solidified upon standing at – 20 °C overnight. **13a**: colorless solid, m.p. 43–45 °C (MeOH/H<sub>2</sub>O); <sup>1</sup>H NMR (250 MHz, CDCl<sub>3</sub>):  $\delta$  = 8.69 (dq, *J* = 0.9, 4.8 Hz, 1 H; Py-H), 7.99 (dm, *J* = 8.3 Hz, 1 H; Ph-H), 7.72 (tm, *J* = 7.4 Hz, 1 H; Py-H), 7.57 (dm, *J* = 6.8 Hz, 1 H; Py-H), 7.51–7.21 (m, 4 H; Ar-H), 1.43–1.36 (m, 1 H; cPr-CH), 0.41–0.31 (m, 6 H; 3 cPr-CH<sub>2</sub>), 0.09 ppm (q, *J* = 5.3 Hz, 2 H; cPr-CH<sub>2</sub>); <sup>13</sup>C NMR (62.9 MHz, CDCl<sub>3</sub>):  $\delta$  = 160.2 (C), 148.8 (CH), 143.8 (C), 141.3 (C), 135.2 (CH), 131.7 (CH), 129.8 (CH), 127.9 (CH), 126.1 (CH), 124.2 (CH), 121.3 (CH), 24.8 (C), 18.7 (CH), 11.6 (2 CH<sub>2</sub>), 3.1 ppm (2 CH<sub>2</sub>). **14**: colorless solid, m.p. 92 °C (hexane/Et<sub>2</sub>O); <sup>1</sup>H NMR (250 MHz, CDCl<sub>3</sub>):  $\delta$  = 8.70 (dq, *J* = 1.0, 4.8 Hz, 1 H; Py-H), 7.74 (td, *J* = 1.6, 7.8 Hz, 1 H; Py-H), 7.45 (dt, *J* = 1.0, 7.8 Hz, 1 H; Py-H), 7.30–7.25 (m, 4 H; Ar-H), 1.31–1.22 (m, 2 H; cPr-CH), 0.51–0.45 (m, 4 H; 2 cPr-CH<sub>2</sub>), 0.23–0.14 (m, 8 H; 4 cPr-CH<sub>2</sub>), –0.04 to –0.10 ppm (m, 4 H; 2 cPr-CH<sub>2</sub>); <sup>13</sup>C NMR (62.9 MHz, CDCl<sub>3</sub>):  $\delta$  = 159.5 (C), 148.2 (CH), 144.4 (2 C), 142.5 (C), 134.6 (CH), 129.8 (2 CH), 127.8 (CH), 126.2 (CH), 121.5 (CH), 25.5 (2 C), 18.3 (2 CH), 11.3 (broad, 2 CH<sub>2</sub>), 10.3 (broad, 2 CH<sub>2</sub>), 3.3 (broad, 2 CH<sub>2</sub>), 3.0 ppm (broad, 2 CH<sub>2</sub>). The structures of the compounds **13a** and **14** were proved by X-ray crystal structure analysis.<sup>6</sup>

b) Column chromatography of the residue obtained from **1a** (201.4 mg, 1.298 mmol), **12** (312.0 mg, 365.3  $\mu$ L, 3.894 mmol), [RuCl<sub>2</sub>(cod)]<sub>n</sub> (18.2 mg, 64.8  $\mu$ mol) and P(*o*-biphenyl)(*t*Bu)<sub>2</sub> (**10**) (38.7 mg, 129.8  $\mu$ mol) according to GP1 (48 h heating) afforded **14** (115.1 mg, 28%, *R<sub>f</sub>* = 0.30 in hexane/Et<sub>2</sub>O 5:1), recovered **1a** (18.1 mg, 9%, *R<sub>f</sub>* = 0.16 in hexane/Et<sub>2</sub>O 5:1) and **13a** (200.0 mg, 65%, *R<sub>f</sub>* = 0.13) as slightly yellow oils.



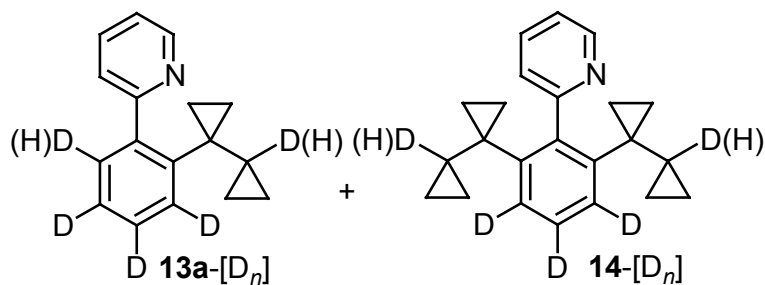

**Oligodeuterated 2-[(2-bicyclopropyl-1-yl)phenyl]pyridine (5-[D<sub>n</sub>]), 2-[2,6-bis(bicyclopropyl-1-yl)phenyl]pyridine (6-[D<sub>n</sub>]) and 2-(oligodeuteriophenyl)pyridine (1a-[D<sub>n</sub>]):**

Column chromatography of the residue obtained from **1a**-[D<sub>5</sub>] (228.1 mg, 1.423 mmol), **14** (456.2 mg, 534.2 μL, 5.694 mmol), [RuCl<sub>2</sub>(cod)]<sub>n</sub> (19.9 mg, 71.1 μmol) and P(*o*-biphenyl)(*t*Bu)<sub>2</sub> (**10**) (42.5 mg, 142.3 μmol) according to GP1 (48 h heating) afforded **16**-[D<sub>n</sub>] (137.2 mg, 30%, *R*<sub>f</sub> = 0.30 in hexane/Et<sub>2</sub>O 5:1), **1a**-[D<sub>n</sub>] (18.1 mg, 8%, *R*<sub>f</sub> = 0.16 in hexane/Et<sub>2</sub>O 5:1) and **13a**-[D<sub>n</sub>] (157.8 mg, 46%, *R*<sub>f</sub> = 0.13 in hexane/Et<sub>2</sub>O 5:1) as slightly yellow oils. **13a**-[D<sub>n</sub>]: MS (ESI): mixture of three components, **13a**-[D<sub>5</sub>] (C<sub>17</sub>H<sub>12</sub>D<sub>5</sub>N, *m/z*: 241.1748, [M+1]<sup>+</sup>, 62%), **13a**-[D<sub>4</sub>] (C<sub>17</sub>H<sub>13</sub>D<sub>4</sub>N, *m/z*: 240.1686, [M+1]<sup>+</sup>, 33%), and **13a**-[D<sub>3</sub>] (C<sub>17</sub>H<sub>14</sub>D<sub>3</sub>N, *m/z*: 239.1623, [M+1]<sup>+</sup>, 5%). This corresponds to the relative intensity of the resonance of cyclopropane CH moiety in the <sup>1</sup>H NMR spectrum. <sup>1</sup>H NMR (250 MHz, CDCl<sub>3</sub>): δ = 8.69 (dq, *J* = 0.8, 4.8 Hz, 1 H; Py-H), 8.00 (s, 0.06 H, Ar-H), 7.75 (td, *J* = 2.0, 7.8 Hz, 1 H; Py-H), 7.57 (dd, *J* = 1.3, 6.8 Hz, 1 H; Py-H), 7.25 (dd, *J* = 1.3, 7.5 Hz, 1 H; Py-H), 1.45–1.34 (m, ca. 0.4 H; cPr-CH and cPr-CD), 0.41–0.26 (m, 6 H; 3 cPr-CH<sub>2</sub>), 0.11–0.06 ppm (m, 2 H; cPr-CH<sub>2</sub>); <sup>13</sup>C NMR (62.9 MHz, CDCl<sub>3</sub>; major component **13a**-[D<sub>5</sub>]): δ = 160.2 (C), 148.7 (CH), 143.7 (C), 141.2 (C), 135.2 (CH), 131.8 (t, *J* = 18.8 Hz, CD), 129.1 (t, *J* = 20.0 Hz, CD), 127.5 (t, *J* = 20.0 Hz, CD), 125.8 (t, *J* = 20.0 Hz, CD), 124.2 (CH), 121.3 (CH), 24.6 (C), 18.3 (t, *J* = 24.5 Hz, CD), 11.6 (2 CH<sub>2</sub>), 3.0 ppm (2 CH<sub>2</sub>). <sup>13</sup>C NMR (62.9 MHz, CDCl<sub>3</sub>; clearly observable signals of the second major component **13a**-[D<sub>4</sub>]): δ = 24.7 (C), 18.7 (CH), 11.6 (2 CH<sub>2</sub>), 3.1 ppm (2 CH<sub>2</sub>). **14**-[D<sub>n</sub>]: MS (ESI) spectrum of this compound disclosed this to be a mixture of three components, i. e. **14**-[D<sub>5</sub>] (C<sub>23</sub>H<sub>20</sub>D<sub>5</sub>N, *m/z*: 321.2383, [M+1]<sup>+</sup>, 25%), **14**-[D<sub>4</sub>] (C<sub>23</sub>H<sub>21</sub>D<sub>4</sub>N, *m/z*: 320.3216, [M+1]<sup>+</sup>, 49%), and **14**-[D<sub>3</sub>] (C<sub>23</sub>H<sub>22</sub>D<sub>3</sub>N, *m/z*: 319.2253, [M+1]<sup>+</sup>, 26%). This is in line with the relative intensity of the signal of cyclopropane CH moiety in the <sup>1</sup>H NMR spectrum. <sup>1</sup>H NMR (250 MHz, CDCl<sub>3</sub>): δ = 8.70 (dq, *J* = 0.9, 4.8 Hz, 1 H; Py-H), 7.74 (td, *J* = 1.8, 7.8 Hz, 1 H; Py-H), 7.44 (d, *J* = 1.0, 7.8 Hz, 1 H; Py-H), 7.27 (td, *J* = 1.3, 5.0 Hz, 1 H; Py-H), 1.33–1.18 (m, ca. 1 H; cPr-CH and cPr-CD), 0.50–0.44 (m, 4 H; 2 cPr-CH<sub>2</sub>), 0.22–0.07 (m, 8 H; 4 cPr-CH<sub>2</sub>), –0.06 to –0.11 ppm (m, 4 H; 2 cPr-CH<sub>2</sub>); <sup>13</sup>C

NMR (62.9 MHz, CDCl<sub>3</sub>; major component **14**-[D<sub>4</sub>]):  $\delta$  = 159.4 (C), 148.1 (CH), 144.2 (2 C), 142.4 (C), 134.5 (CH), 129.3 (t,  $J$  = 23.8 Hz, 2 CD), 126.9 (t,  $J$  = 28.0 Hz, CD), 126.1 (CH), 121.4 (CH), 25.4 (C), 25.3 (C), 18.2 (CH), 17.8 (t,  $J$  = 24.5 Hz, CD), 11.3 (broad, 2 CH<sub>2</sub>), 10.2 (broad, 2 CH<sub>2</sub>), 3.2 (broad, 2 CH<sub>2</sub>), 3.0 ppm (broad, 2 CH<sub>2</sub>).

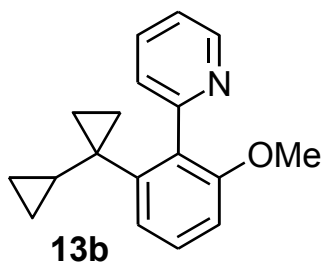

### 2-[(2-Bicyclopropyl-1-yl)-6-methoxy-phenyl]pyridine

**(13b)**: Column chromatography of the residue obtained from 2-(2-methoxyphenyl)pyridine (**1b**), (281.3 mg, 1.519 mmol), **12** (182.5 mg, 213.7  $\mu$ L, 2.278 mmol), [RuCl<sub>2</sub>(cod)]<sub>n</sub> (21.3 mg, 75.9  $\mu$ mol) and **11** (72.4 mg, 0.152 mmol) in anhydrous dioxane (3 mL) according to GP1 afforded **13b** (341.9 mg,

85%,  $R_f$  = 0.17 in hexane/Et<sub>2</sub>O 5:2) as slightly yellow oil, which solidified upon standing at 0 °C overnight. **13b**: colorless solid, m.p. 96–98 °C (hexane/Et<sub>2</sub>O); <sup>1</sup>H NMR (250 MHz, CDCl<sub>3</sub>):  $\delta$  = 8.71 (ddd,  $J$  = 0.8, 1.8, 4.8 Hz, 1 H; Py-H), 7.73 (td,  $J$  = 1.8, 7.6 Hz, 1 H; Py-H), 7.34 (dd,  $J$  = 0.8, 8.8 Hz, 1 H; Py-H), 7.29–7.22 (m, 2 H; Ar-H), 7.00 (dd,  $J$  = 0.8, 7.8 Hz, 1 H; Py-H), 6.85 (dd,  $J$  = 0.8, 8.3 Hz, 1 H; Ar-H), 3.69 (s, 1 H; OMe), 0.47–0.49 (m  $\frac{1}{2}$  AA'BB', 2 H; cPr-CH<sub>2</sub>), 0.28–0.22 (m  $\frac{1}{2}$  AA'BB', 2 H; cPr-CH<sub>2</sub>), 0.20–0.16 (m  $\frac{1}{2}$  AA'BB', 2 H; cPr-CH<sub>2</sub>), –0.02 to –0.08 (m  $\frac{1}{2}$  AA'BB', 2 H; cPr-CH<sub>2</sub>); <sup>13</sup>C NMR (62.9 MHz, CDCl<sub>3</sub>):  $\delta$  = 157.1 (C), 156.9 (C), 148.7 (CH), 145.9 (C), 135.0 (CH), 130.9 (C), 128.6 (CH), 125.7 (CH), 123.7 (CH), 121.4 (CH), 55.5 (OCH<sub>3</sub>), 25.1 (C), 18.1 (CH), 10.6 (2 CH<sub>2</sub>), 3.0 ppm (2 CH<sub>2</sub>). The structures of the compound **13b** was proved by X-ray crystal structure analysis.<sup>6</sup>

**Competitive ring opening reactions of 2-phenylmethylenecyclopropane (2) and methylenespiropentane (23) followed by Diels-Alder [4+2] cycloaddition.**

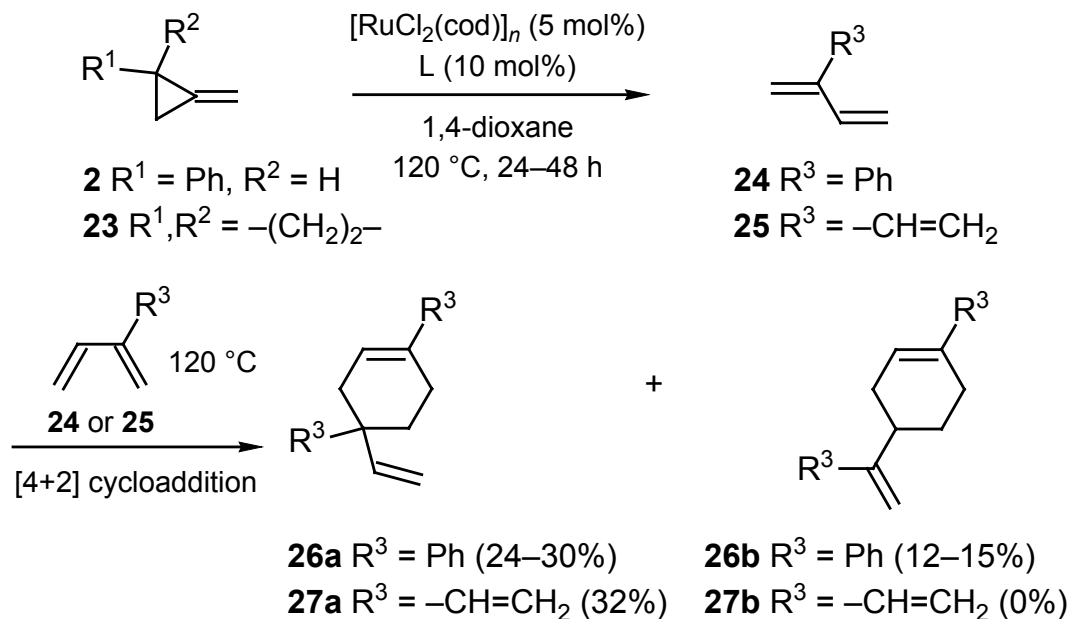

**Scheme 2.** Competitive reactions of 2-phenylmethylenecyclopropane (**2**) and methylenespiropentane (**23**) upon hydroarylation under ruthenium catalysis at 120 °C in dioxane.<sup>9</sup>

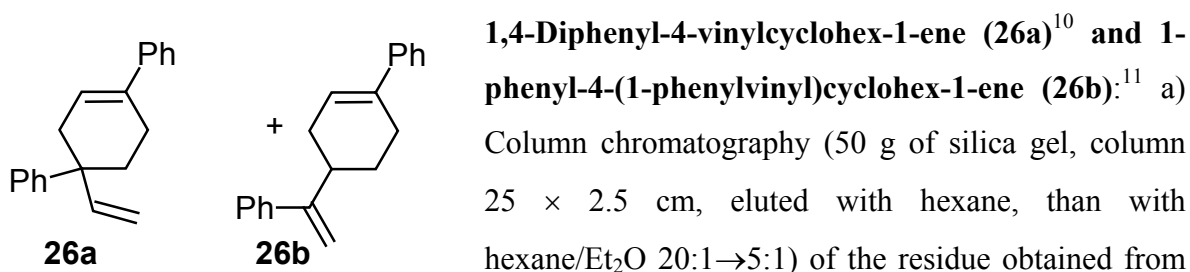

**1a** (188.2 mg, 1.213 mmol), **2** (473.7 mg, 499  $\mu\text{L}$ , 3.639 mmol),  $[\text{RuCl}_2(\text{cod})]_n$  (17.0 mg, 60.6  $\mu\text{mol}$ ) and *rac*-BINAP (**5**) (75.5 mg, 121.2  $\mu\text{mol}$ ) according to GP1 (48 h heating) afforded a non-separable 2:1 mixture of **26a** and **26b** (170.1 mg, 36%,  $R_f = 0.23$  in hexane) as a colorless oil, and recovered **1** (194.4 mg, 97%,  $R_f = 0.16$  in hexane/Et<sub>2</sub>O 5:1). **26a**: <sup>1</sup>H NMR (250 MHz, CDCl<sub>3</sub>):  $\delta$  = 7.42–7.22 (m, 10 H; Ph-H), 6.24–6.21 (m, 1 H; =CH), 5.96 (dd,  $J = 10.5, 17.3$  Hz, 1 H; =CH), 5.13–5.00 (m, 2 H; =CH<sub>2</sub>), 2.60–2.54 (m, 2 H; CH<sub>2</sub>), 2.28–2.15 (m, 2 H; CH<sub>2</sub>), 2.15–2.06 ppm (m, 2 H; CH<sub>2</sub>); <sup>13</sup>C NMR (62.9 MHz, CDCl<sub>3</sub>):  $\delta$  = 146.3 (C), 145.1 (CH), 141.7 (C), 136.1 (C), 128.2 (2 CH), 128.0 (2 CH), 126.6 (CH), 126.5 (2 CH), 124.9 (2 CH), 122.6 (CH), 112.2 (CH<sub>2</sub>), 43.0 (C), 36.0 (CH<sub>2</sub>), 32.0 (CH<sub>2</sub>), 25.0 ppm (CH<sub>2</sub>). This spectrum was identical to the previously published one.<sup>10</sup> **26b**: <sup>1</sup>H NMR (250 MHz, CDCl<sub>3</sub>):  $\delta$

= 7.42–7.22 (m, 10 H; Ph-H), 6.15–6.14 (m, 1 H; =CH), 5.27–5.24 (m, 2 H; =CH<sub>2</sub>), 2.95–2.85 (m, 1 H; CH), 2.53–2.38 (m, 2 H; CH<sub>2</sub>), 2.28–2.06 ppm (m, 4 H; 2 CH<sub>2</sub>); <sup>13</sup>C NMR (62.9 MHz, CDCl<sub>3</sub>): δ = 155.9 (C), 153.4 (C), 142.4 (C), 141.9 (C), 127.2 (CH), 125.9 (2 CH), 125.0 (2 CH), 123.9 (2 CH), 122.1 (CH), 110.8 (CH<sub>2</sub>), 37.7 (CH), 32.1 (CH<sub>2</sub>), 28.3 (CH<sub>2</sub>), 27.8 ppm (CH<sub>2</sub>). Several signals of aromatic CH fragments are overlapped with the signals of hydrocarbon **26a**.

a) Column chromatography of the residue obtained from **1a** (162.8 mg, 1.050 mmol), **2** (410.1 mg, 431.6 μL, 3.150 mmol), [RuCl<sub>2</sub>(cod)]<sub>n</sub> (14.7 mg, 52.4 μmol) and dppf (**6**) (58.2 mg, 104.8 μmol) according to GP1 (48 h heating) afforded a non-separable 2:1 mixture of **29a** and **29a** (184.6 mg, 45%) and recovered **1a** (156.0 mg, 96%).

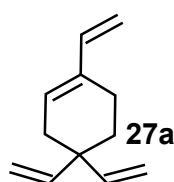

**1,4,4-Trivinylcyclohexene (27a):**<sup>12</sup> Column chromatography (50 g of silica gel, column 25 × 2.5 cm, eluted with hexane, then with hexane/Et<sub>2</sub>O 20:1→5:1) of the residue obtained from **1a** (331.0 mg, 2.133 mmol), **24** (512.7 mg, 603 μL, 6.399 mmol), [RuCl<sub>2</sub>(cod)]<sub>n</sub> (29.9 mg, 106.6 μmol) and

P(*o*-biphenyl)(*t*Bu)<sub>2</sub> (**10**) (63.6 mg, 213.2 μmol) according to GP1 (24 h heating; all quantity of **27** was added in one portion) afforded **27a** (164.5 mg, 32%, *R*<sub>f</sub> = 0.38 in hexane) as a colorless oil and recovered **1a** (314.6 mg, 95%, *R*<sub>f</sub> = 0.16 in hexane/Et<sub>2</sub>O 5:1). **27a**: <sup>1</sup>H NMR (250 MHz, CDCl<sub>3</sub>): δ = 6.34 (dd, *J* = 10.8, 17.8 Hz, 1 H; =CH), 5.77 (dd, *J* = 10.8, 17.8 Hz, 2 H; 2 =CH), 5.75–5.73 (m, 1 H; =CH), 5.08–4.88 (m, 6 H; 3 =CH<sub>2</sub>), 2.21 (br. s, 2 H; CH<sub>2</sub>), 2.14 (tq, *J* = 1.8, 6.4 Hz, 2 H; CH<sub>2</sub>), 1.69 ppm (t, *J* = 6.4 Hz, 2 H; CH<sub>2</sub>); <sup>13</sup>C NMR (62.9 MHz, CDCl<sub>3</sub>): δ = 144.1 (2 CH), 139.5 (CH), 135.4 (C), 112.6 (2 CH<sub>2</sub>), 110.2 (CH<sub>2</sub>), 41.9 (C), 34.4 (CH<sub>2</sub>), 31.3 (CH<sub>2</sub>), 21.2 ppm (CH<sub>2</sub>). These spectra correspond to the previously published ones (measured in C<sub>6</sub>D<sub>6</sub>).<sup>12</sup>

## References and Notes

- (1) Arora, S.; Binger, P. *Synthesis* **1974**, 801–803.
- (2) de Meijere, A.; Kozhushkov, S. I.; Späth, T. *Org. Synth.* **2000**, 78, 142–151.
- (3) de Meijere, A.; Kozhushkov, S. I.; Faber, D.; Bagutskii, V.; Boese, R.; Haumann, T.; Walsh, R. *Eur. J. Org. Chem.* **2001**, 3607–3614.
- (4) Albers, M. O.; Singleton, E.; Yates, Y. E. *Inorg. Synth.* **1989**, 26, 253.

- (5) (a) Harrison, J. J.; Pellegrini, J. P.; Selwitz, C. M. *J. Org. Chem.* **1981**, *46*, 2169–2171.  
 (b) Bonnet, V.; Mongin, F.; Trécourt, F.; Quéguiner, G.; Knochel, P. *Tetrahedron* **2002**, *58*, 4429–4438.
- (6) CCDC-678126 (**13a**), -688765 (**13b**) and -678125 (**14**) contain the supplementary crystallographic data for this paper. These data can be obtained free of charge via [www.ccdc.cam.ac.uk/conts/retrieving.html](http://www.ccdc.cam.ac.uk/conts/retrieving.html) (or from the Cambridge Crystallographic Data Centre, 12, Union Road, Cambridge CB21EZ, UK; fax: (+44)1223-336-033; or [deposit@ccdc.cam.ac.uk](mailto:deposit@ccdc.cam.ac.uk)).
- (7) (a) de Meijere, A.; Kozhushkov, S. I.; Schill, H. *Chem. Rev.* **2006**, *106*, 4926–4996, and references cited therein. (b) von Seebach, M.; Kozhushkov, S. I.; Frank, D.; Boese, R.; Benet-Buchholz, J.; Yufit, D. S.; Schill, H.; de Meijere, A. *Chem. Eur. J.* **2007**, *13*, 167–177, and references cited therein.
- (8) Preparation: Toshinao, U.; Kawazura, H.; Ishii, Y.; Bonnet, J. J.; Ibers, J. A. *J. Organomet. Chem.* **1974**, *65*, 253–266, and: <http://www.syntheticpages.org/pages/53>
- (9) For the details of metal-catalyzed reorganization of methylenecyclopropanes into substituted 1,3-butadienes see: (a) Nishihara, Y.; Yoda, C.; Osakada, K. *Organometallics* **2001**, *20*, 2124–2126. (b) Nüske, H.; Bräse, S.; Kozhushkov, S. I.; Noltemeyer, M.; Es-Sayed, M.; de Meijere, A. *Chem. Eur. J.* **2002**, *8*, 2350–2369. (c) Nishihara, Y.; Yoda, C.; Itazaki, M.; Osakada, K. *Bull. Chem. Soc. Jpn.* **2005**, *78*, 1469–1480. (d) Shi, M.; Wang, B.-Y.; Huang, J.-W. *J. Org. Chem.* **2005**, *70*, 5606–5610.
- (10) Blau, K.; Voerkel, V.; Willecke, L. *J. Prakt. Chem.* **1986**, *328*, 29–34.
- (11) (a) Carothers, W. H.; Berchet G. J. *J. Am. Chem. Soc.* **1933**, *55*, 2813–2817. (b) Alder, K.; Haydn, J. *Justus Liebigs Ann. Chem.* **1950**, *570*, 201–213. (c) Nazarov, I. N.; Kuznetsova, A. I. *J. Gen. Chem. USSR (Engl. Transl.)* **1960**, *30*, 143–147; *Zh. Obshch. Khim.* **1960**, *30*, 134–138. (d) Hawkins, E. G.; Thompson, R. D. *J. Chem. Soc.* **1961**, 370–373.
- (12) Trahanovsky, W. S.; Koeplinger, K. A. *J. Org. Chem.* **1992**, *57*, 4711–4716.

S13

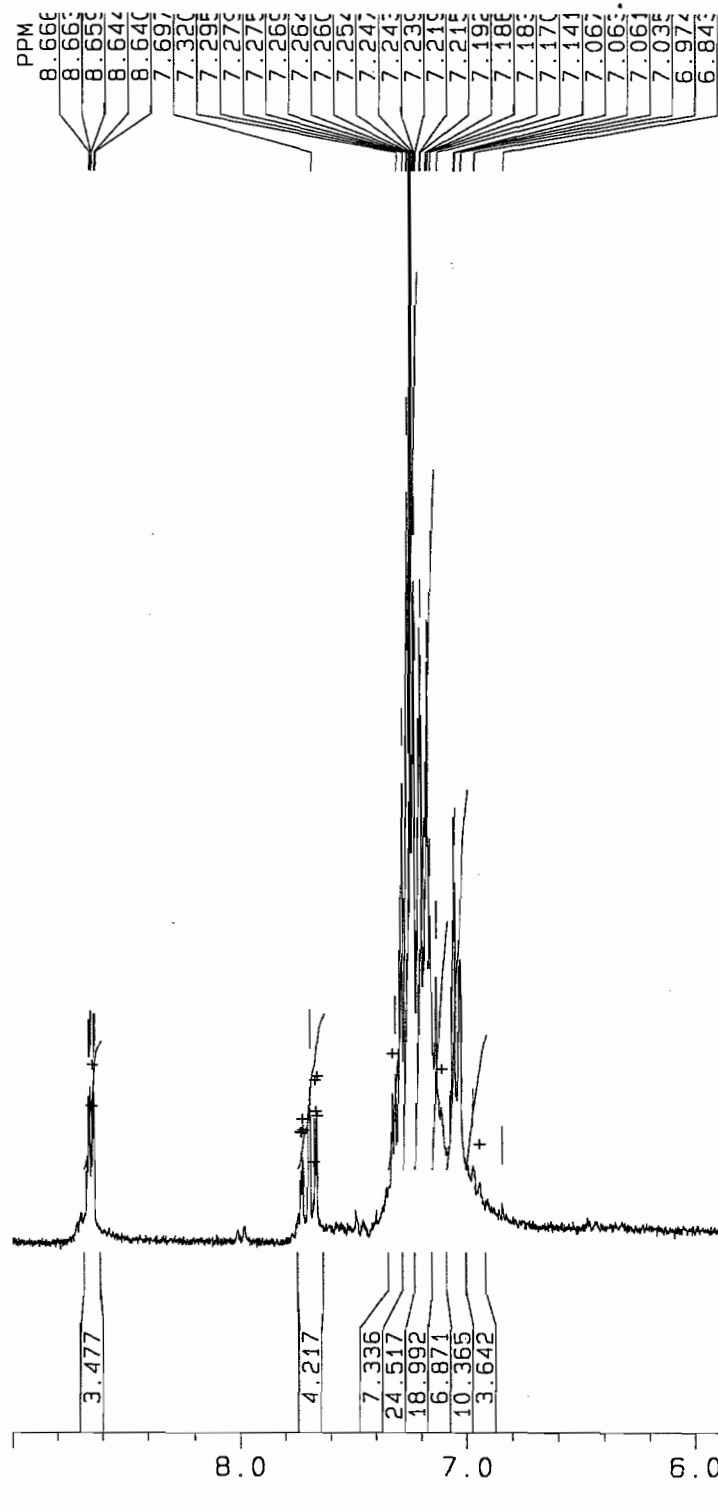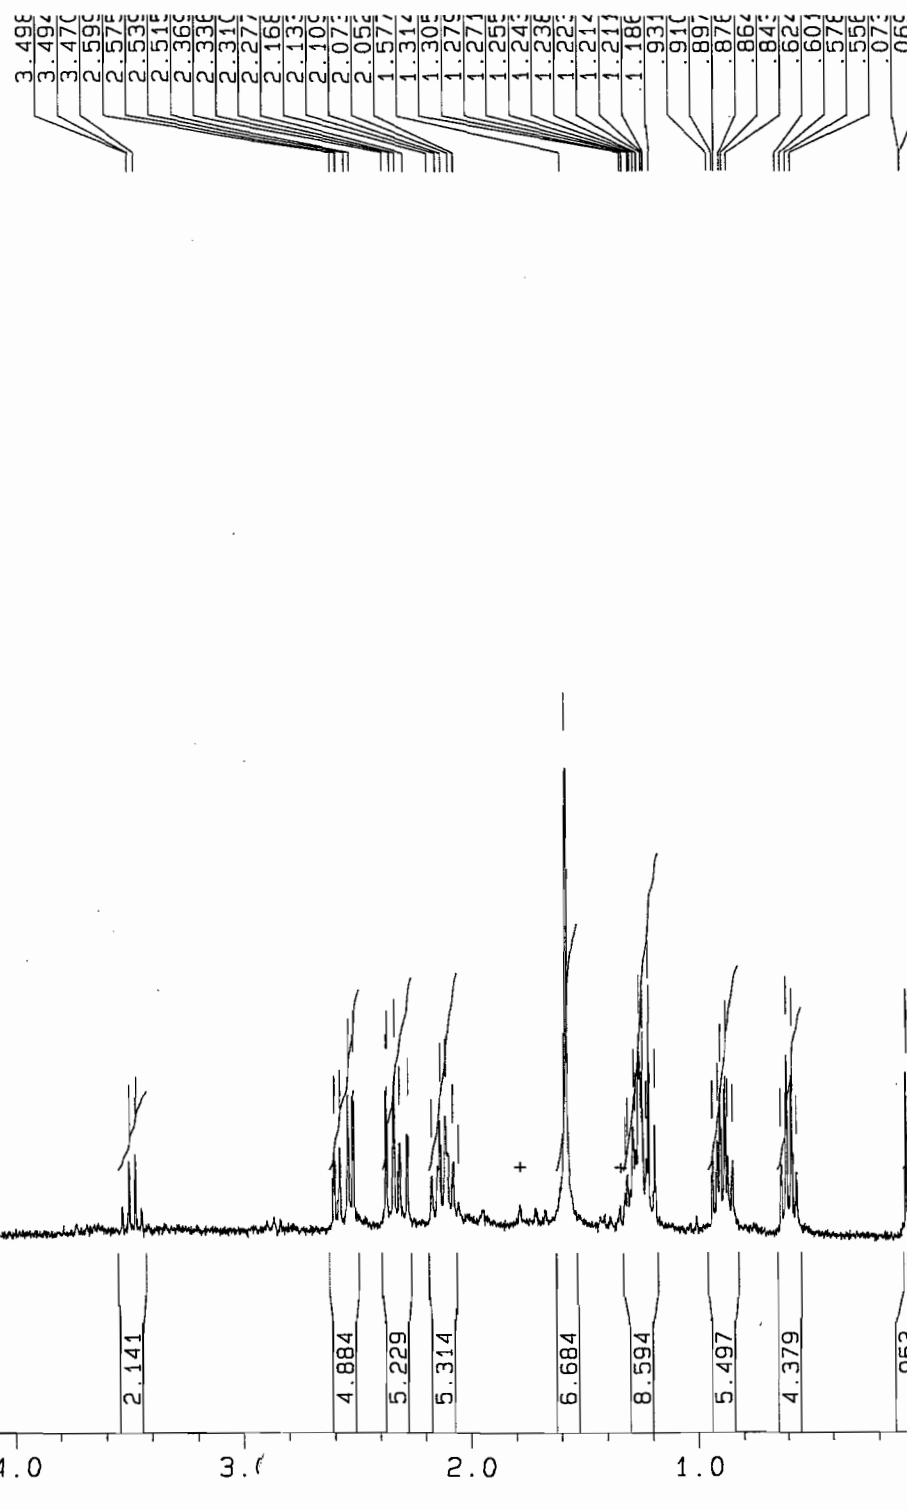

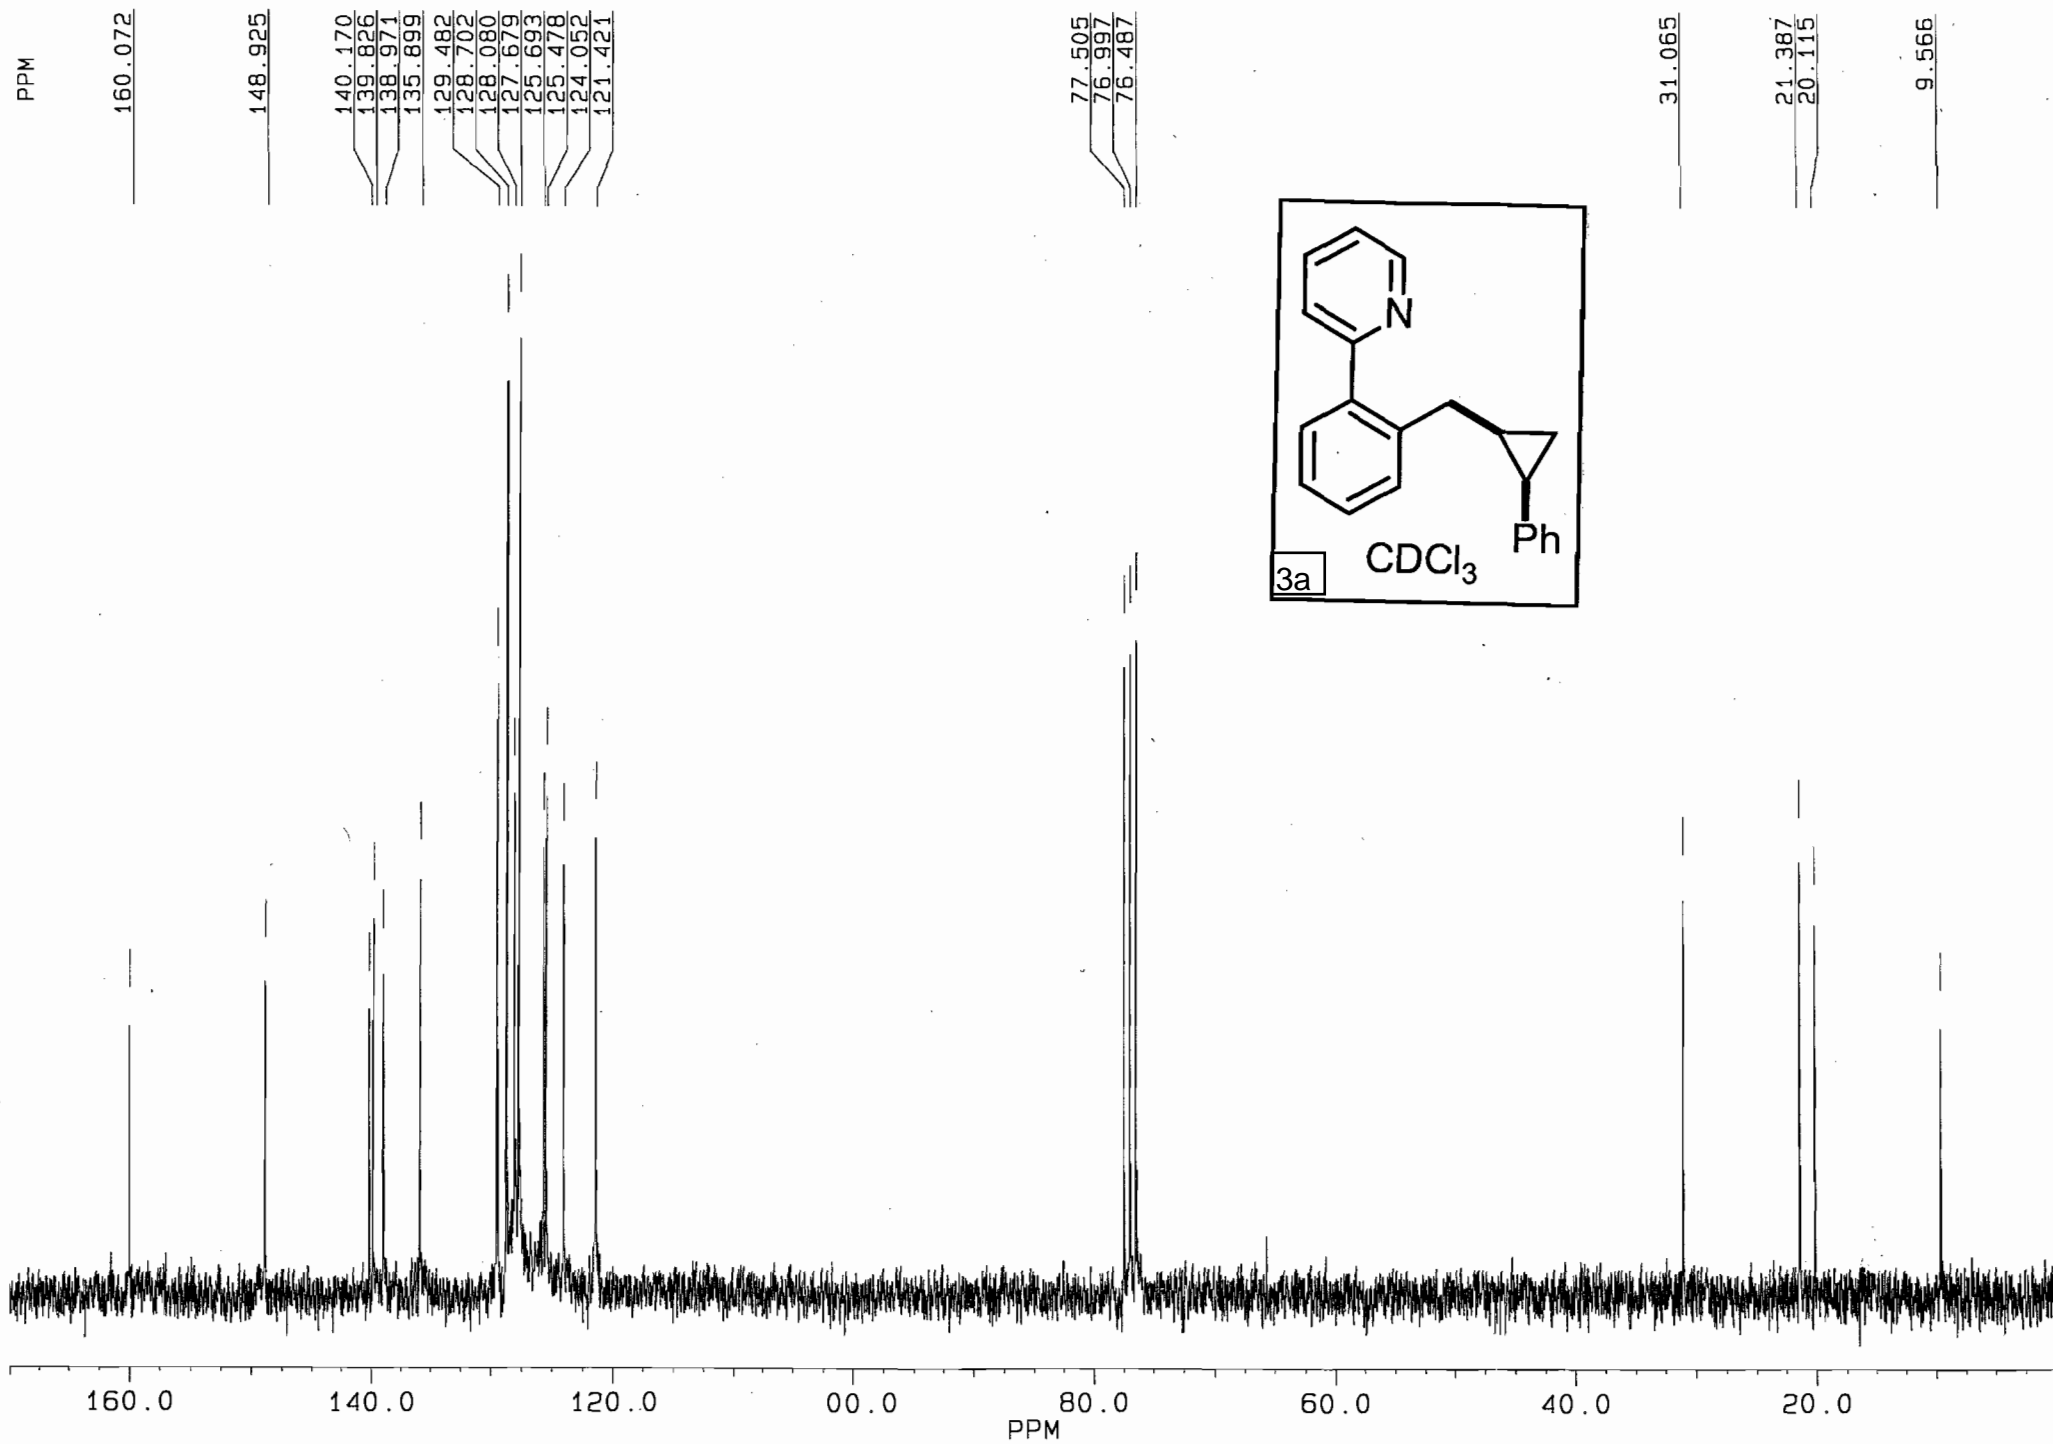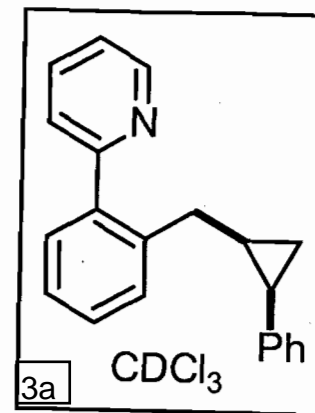

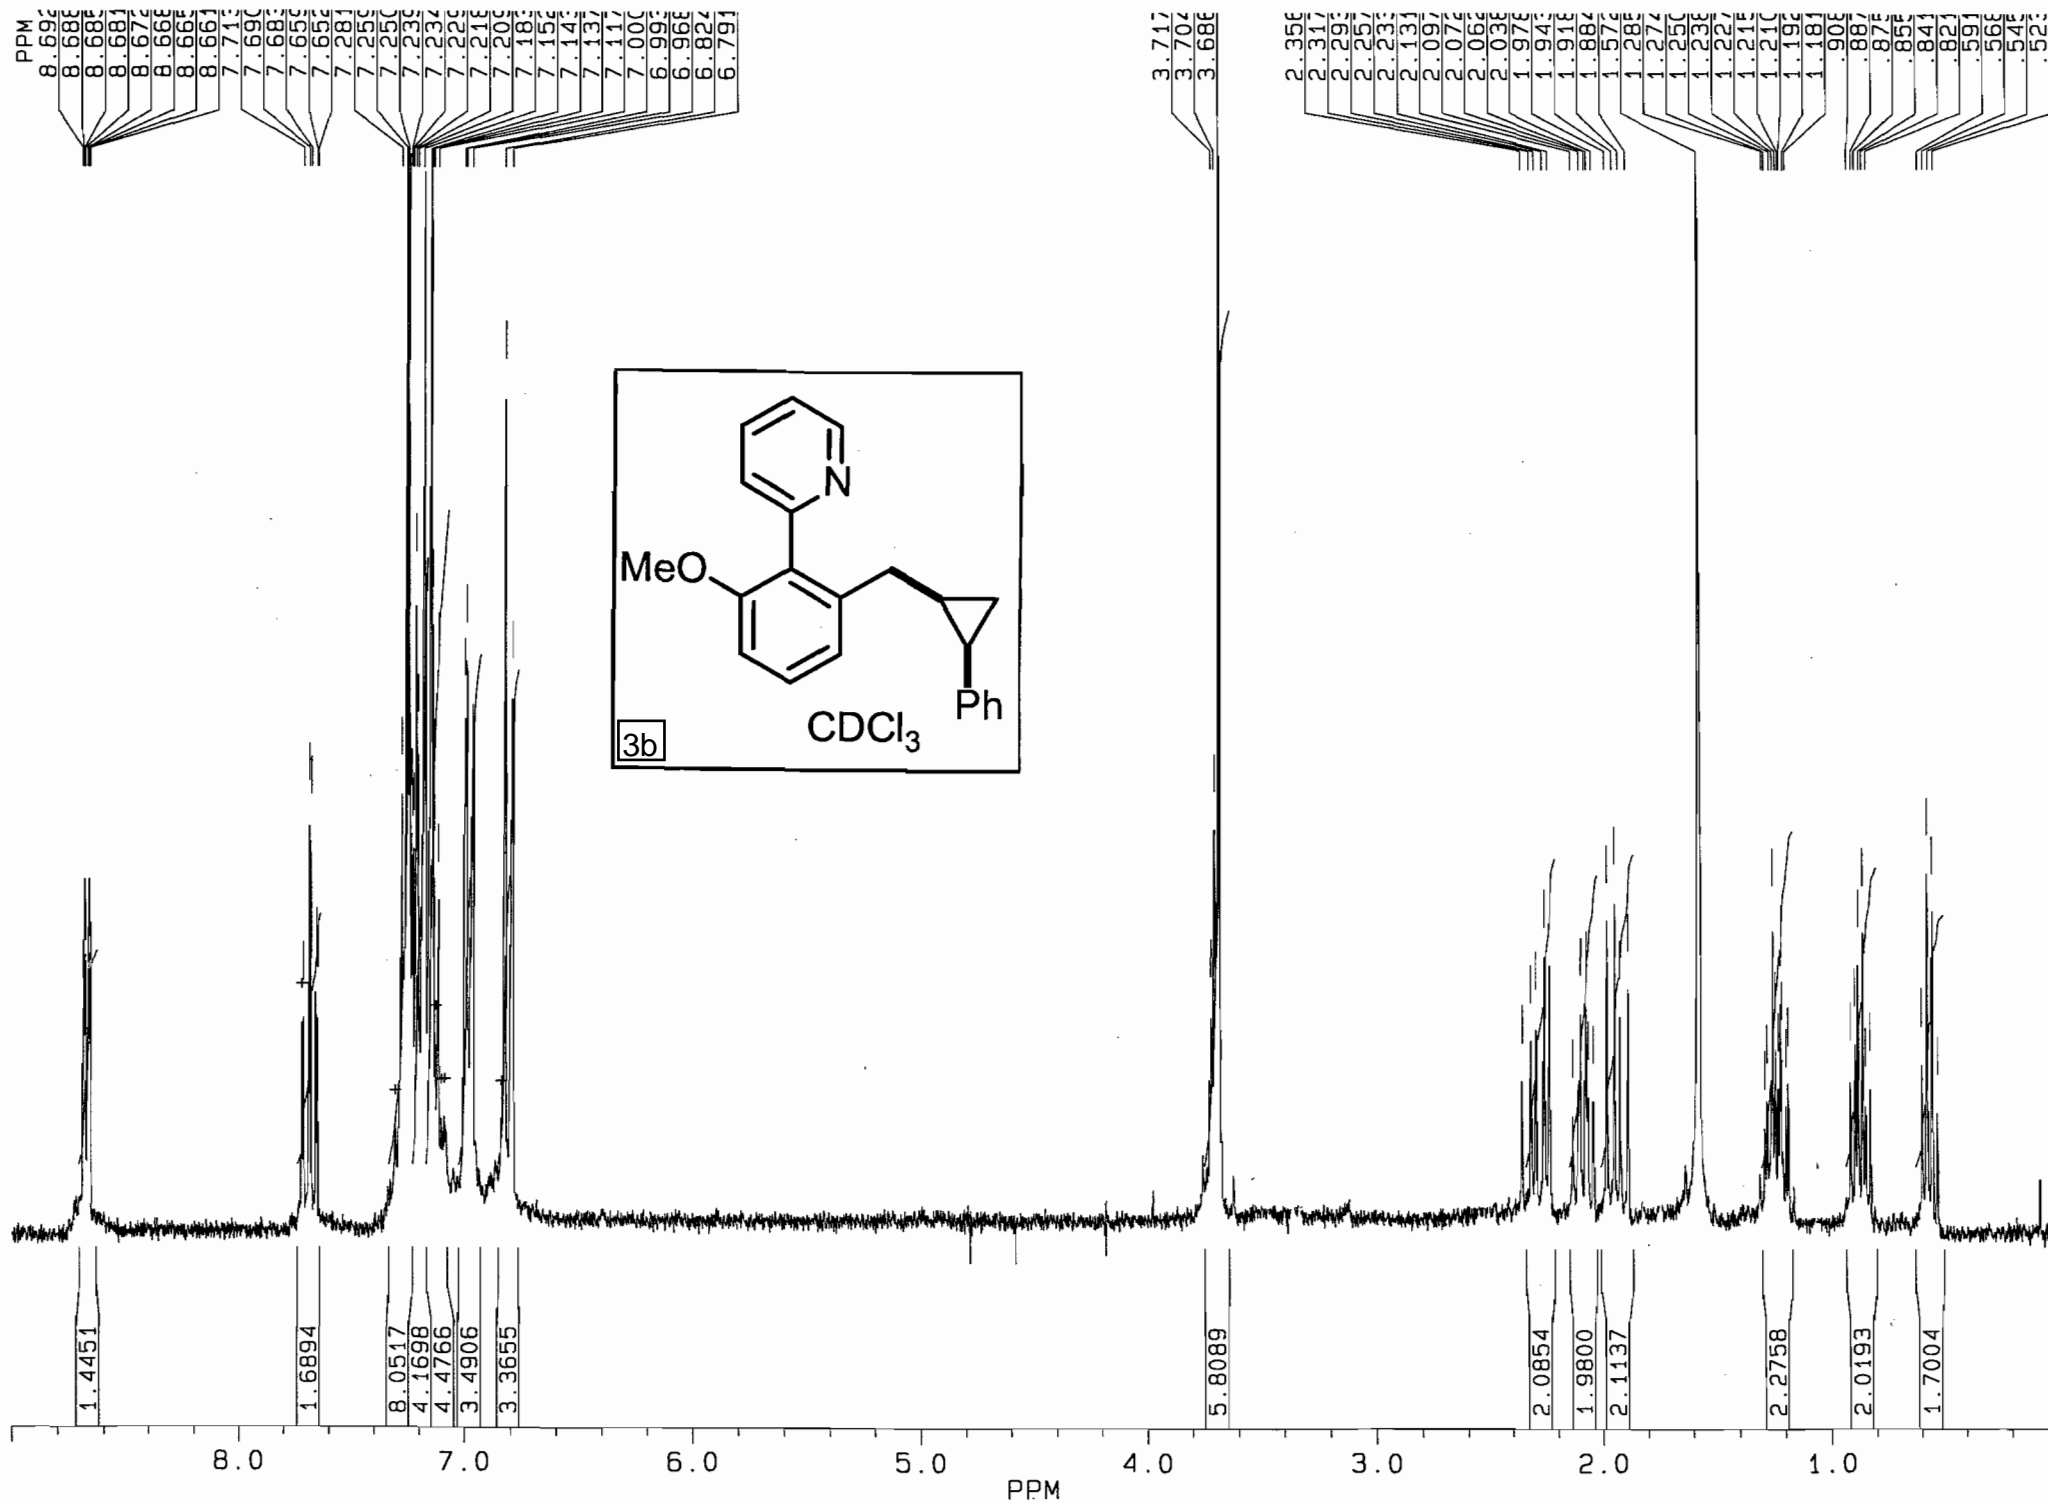



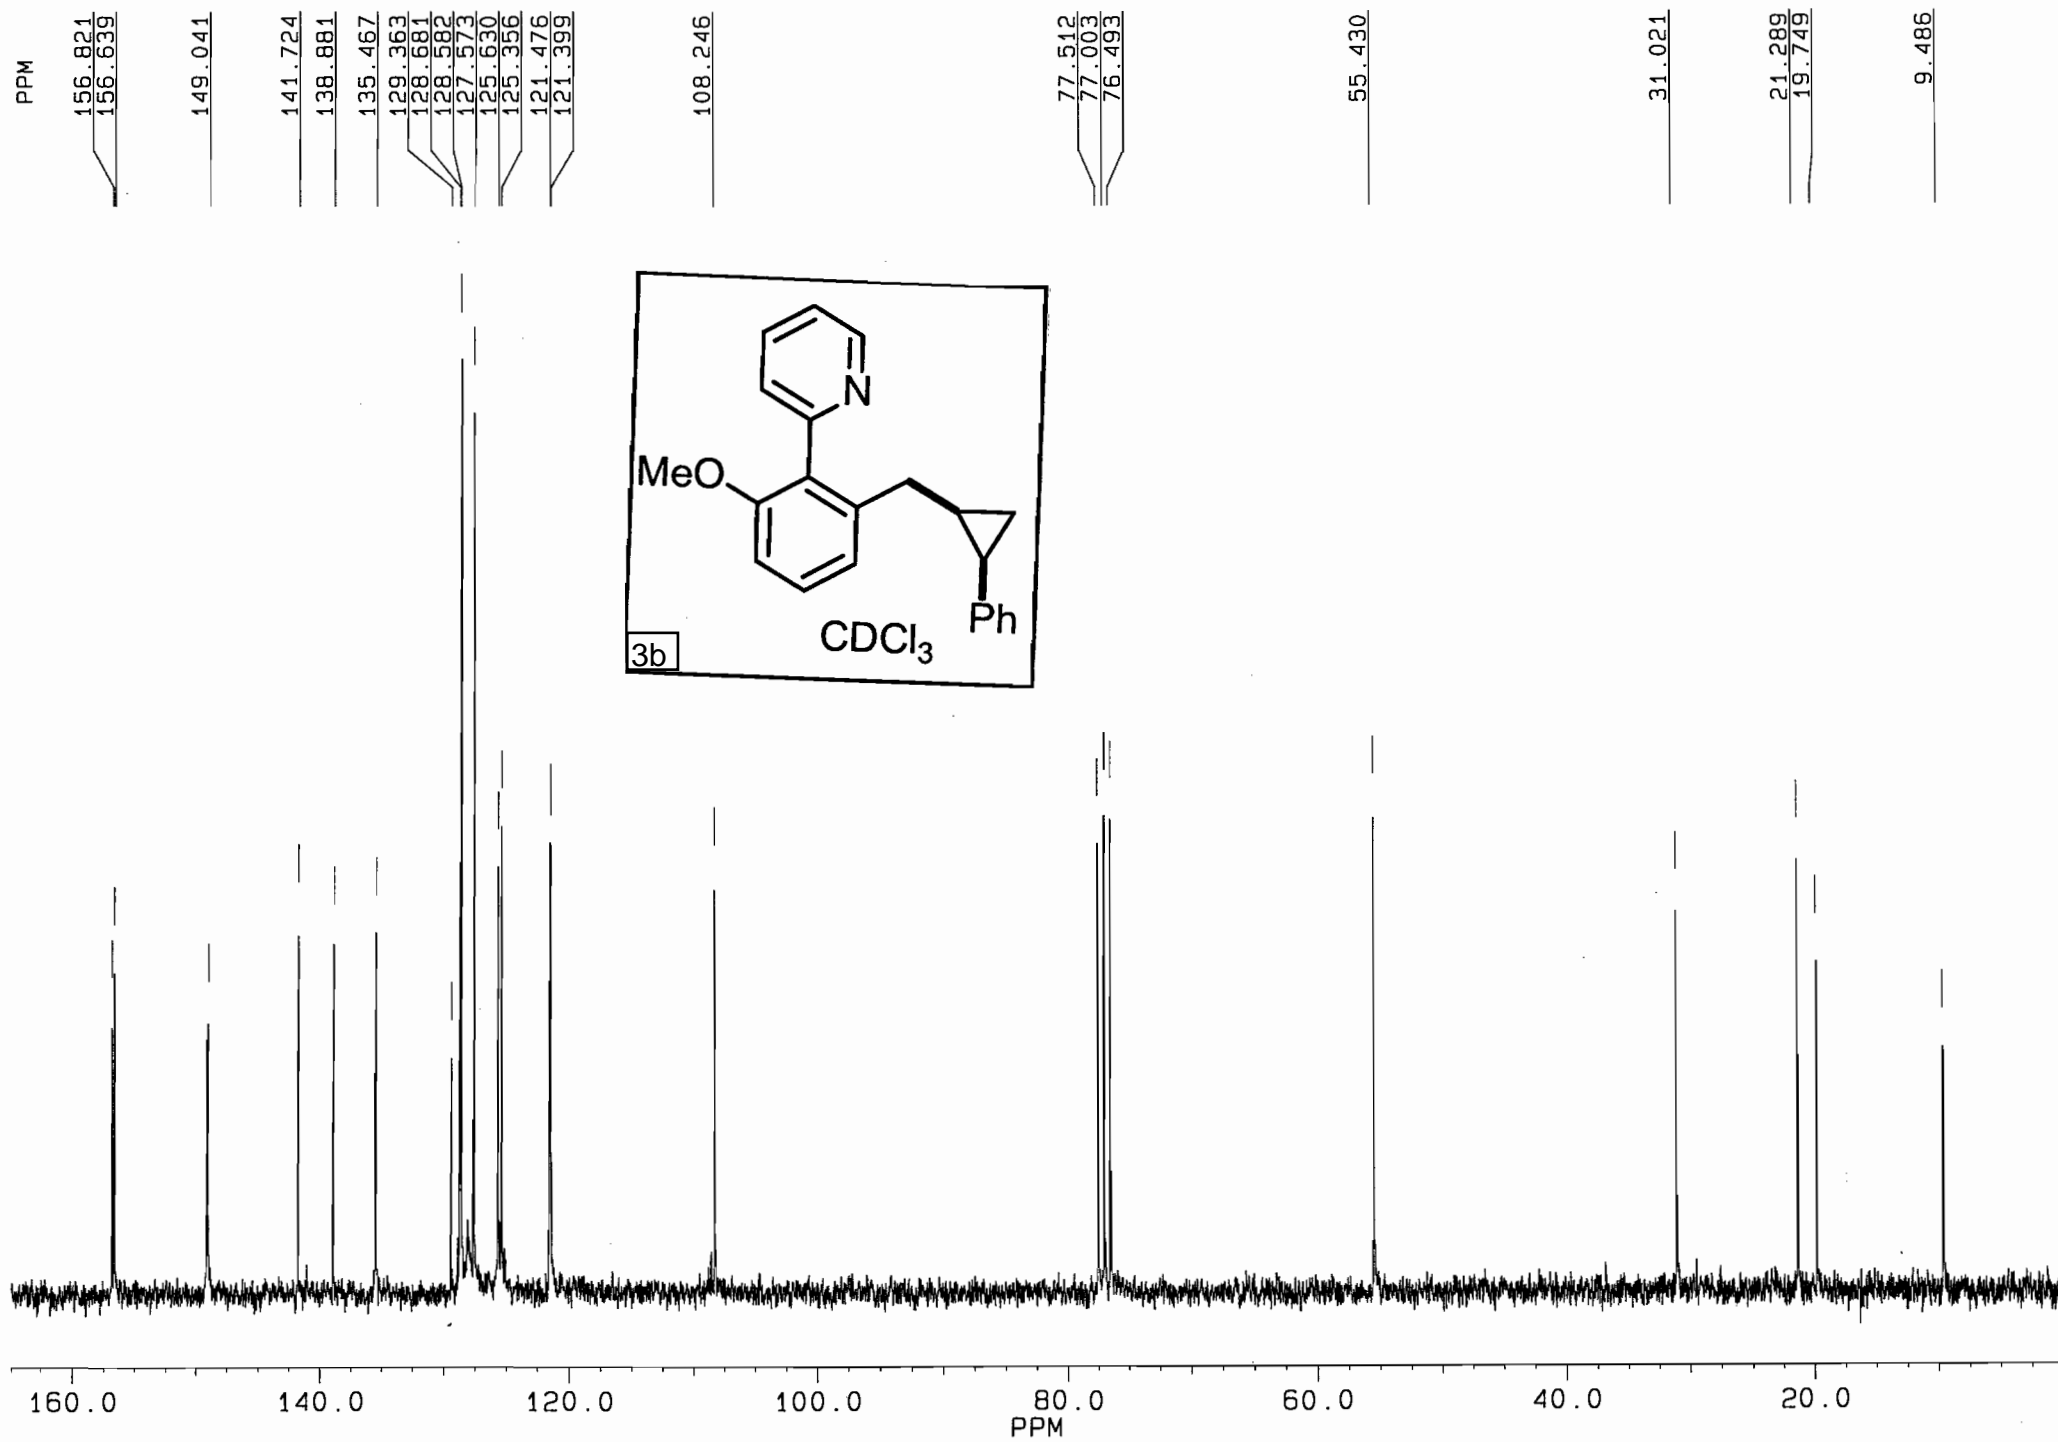

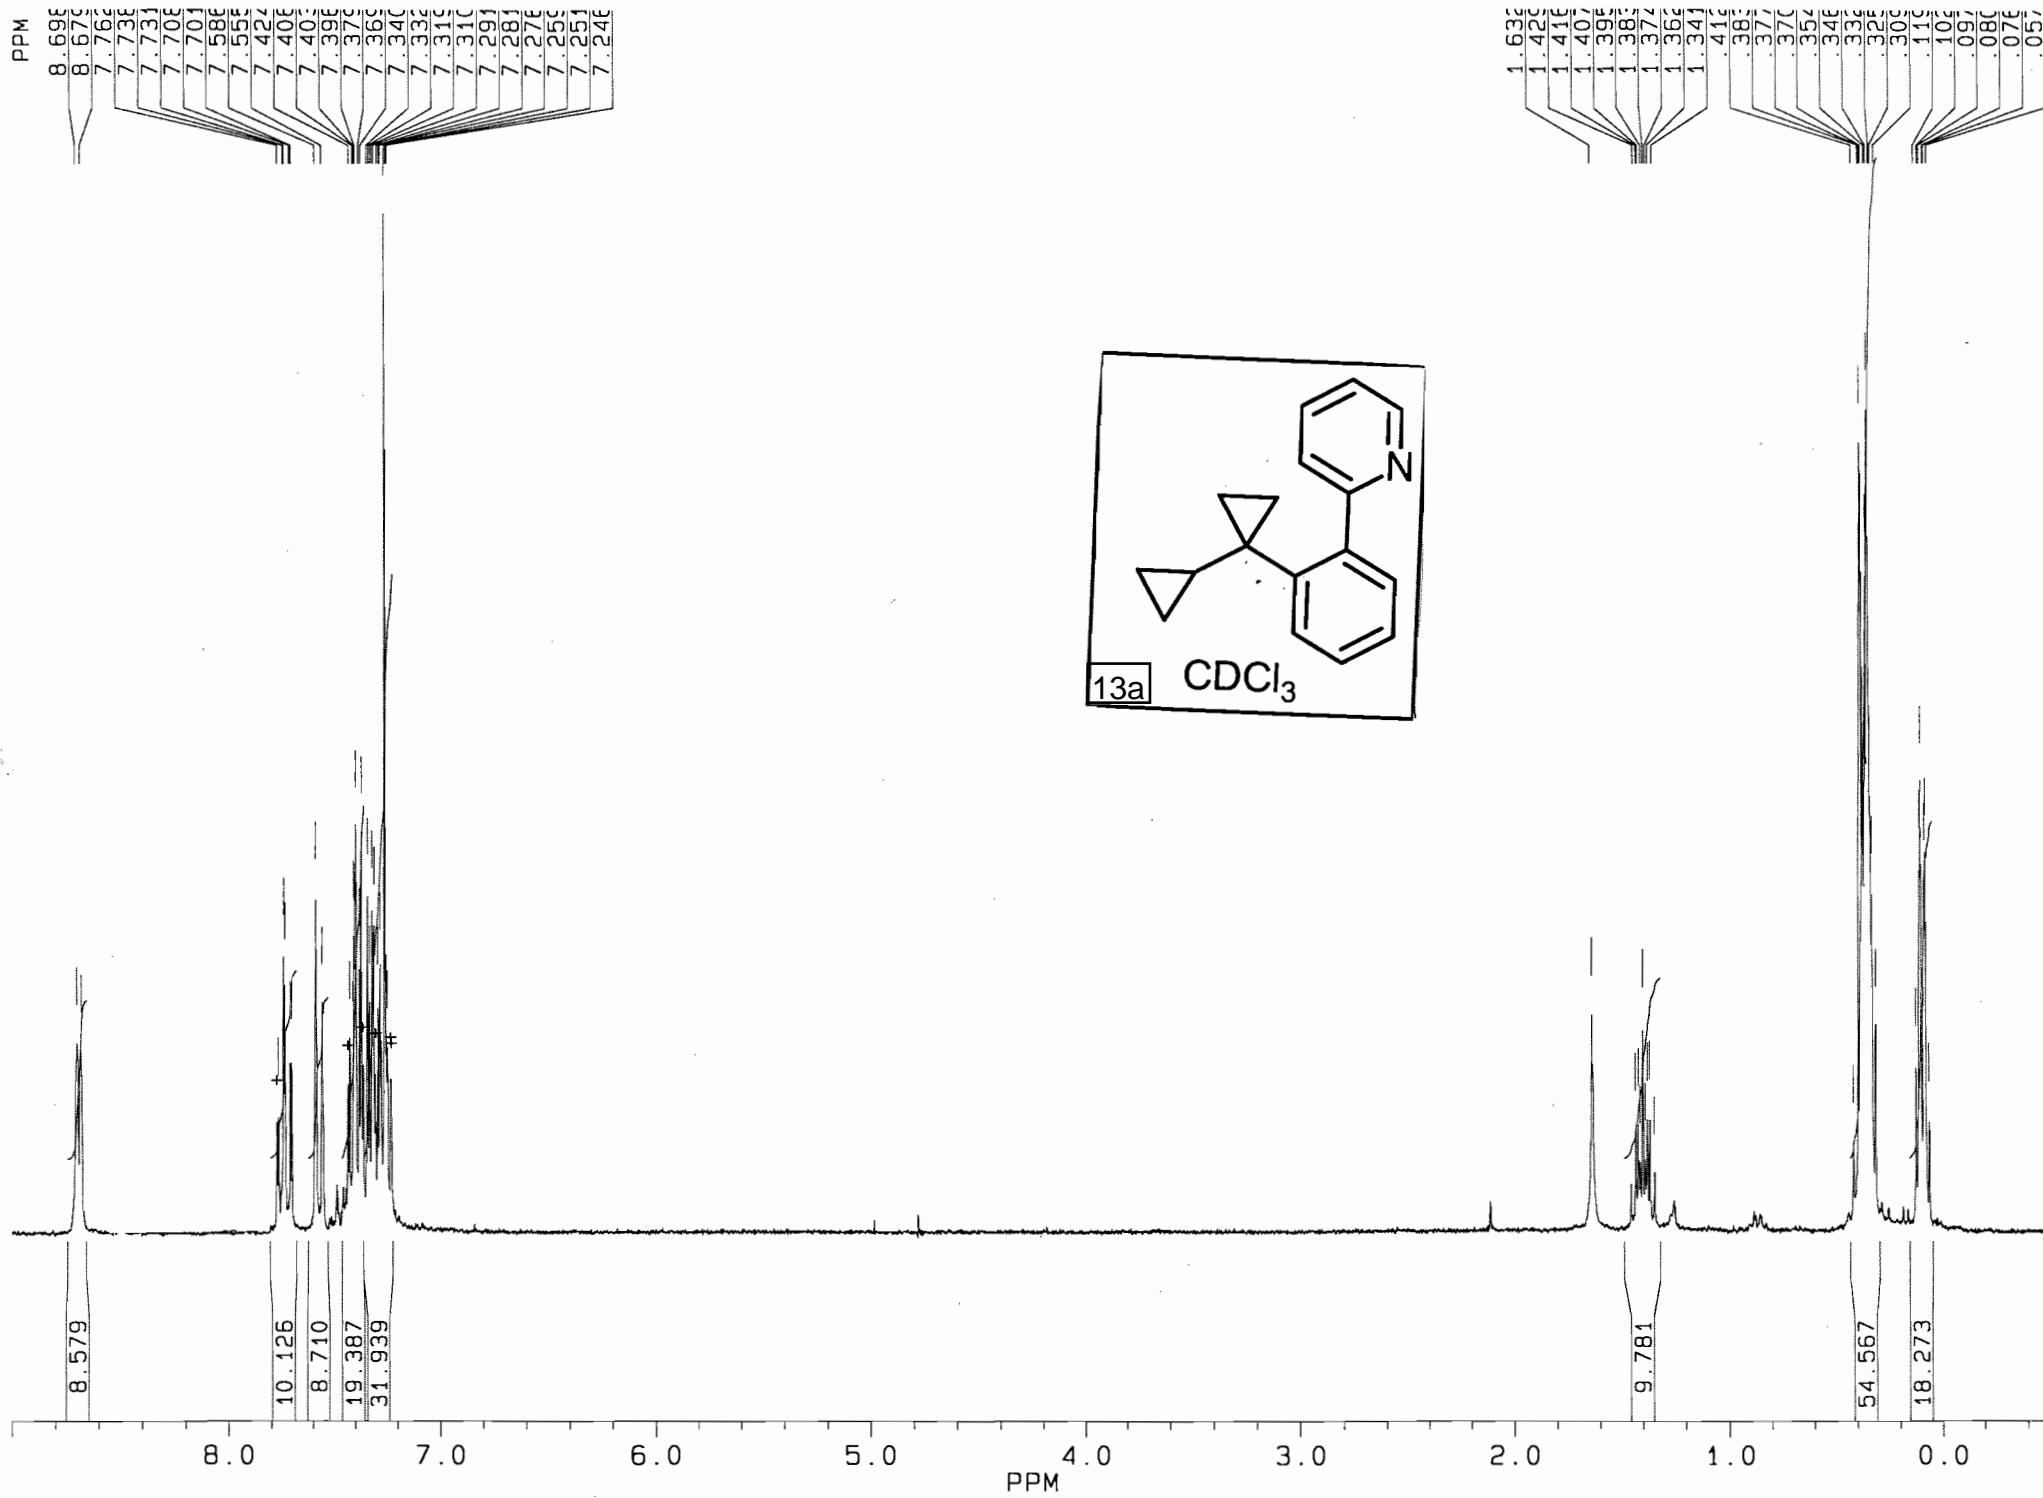

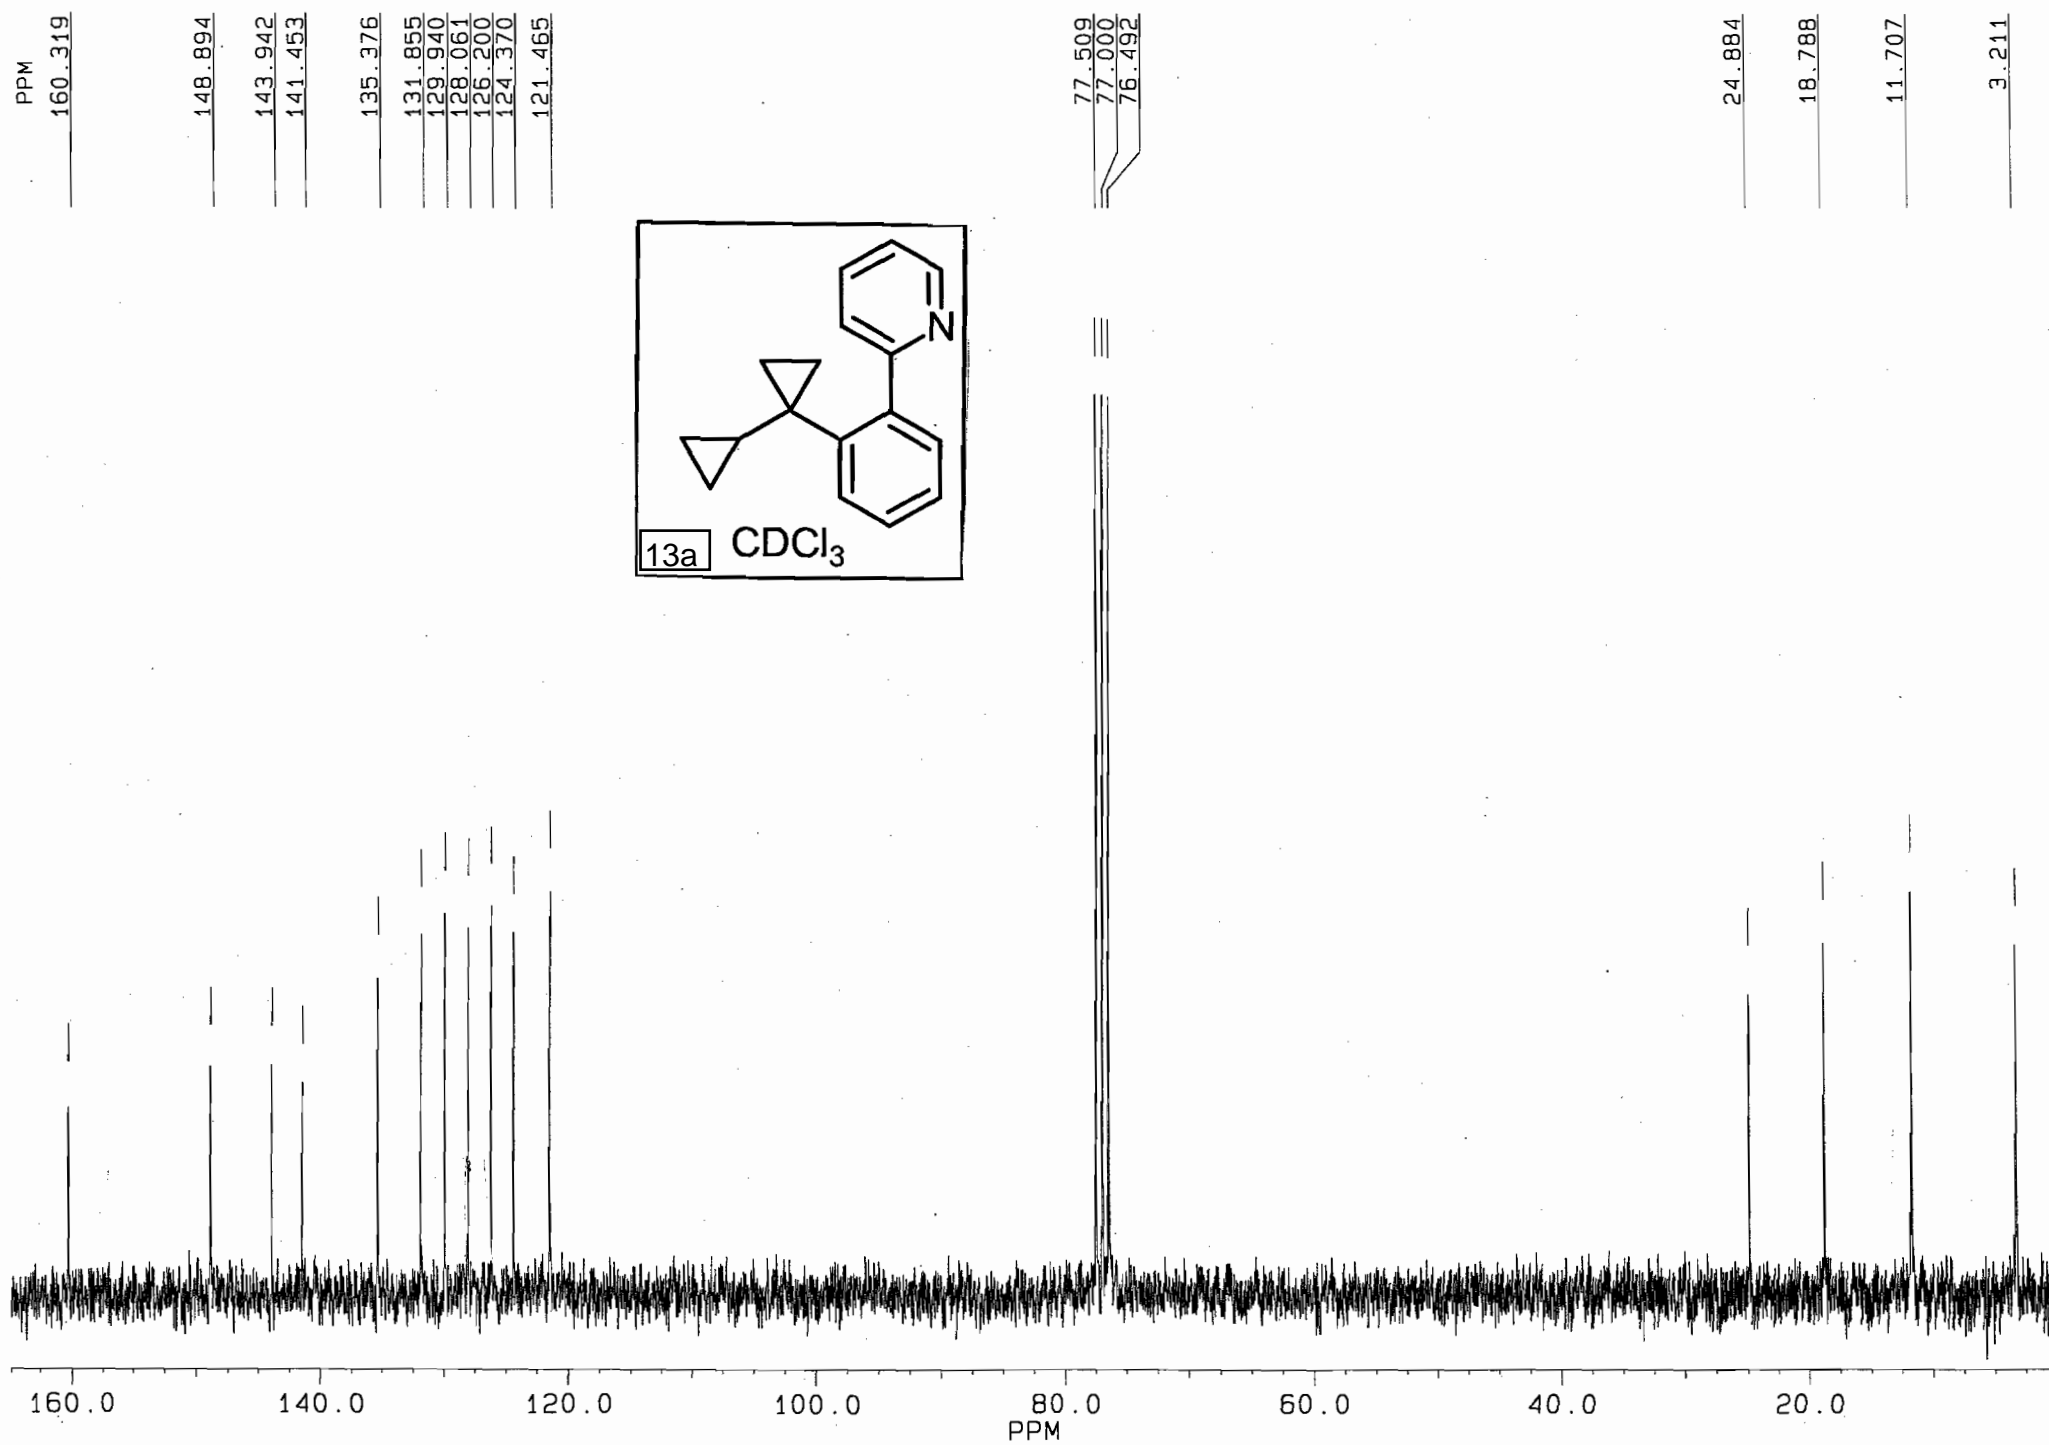

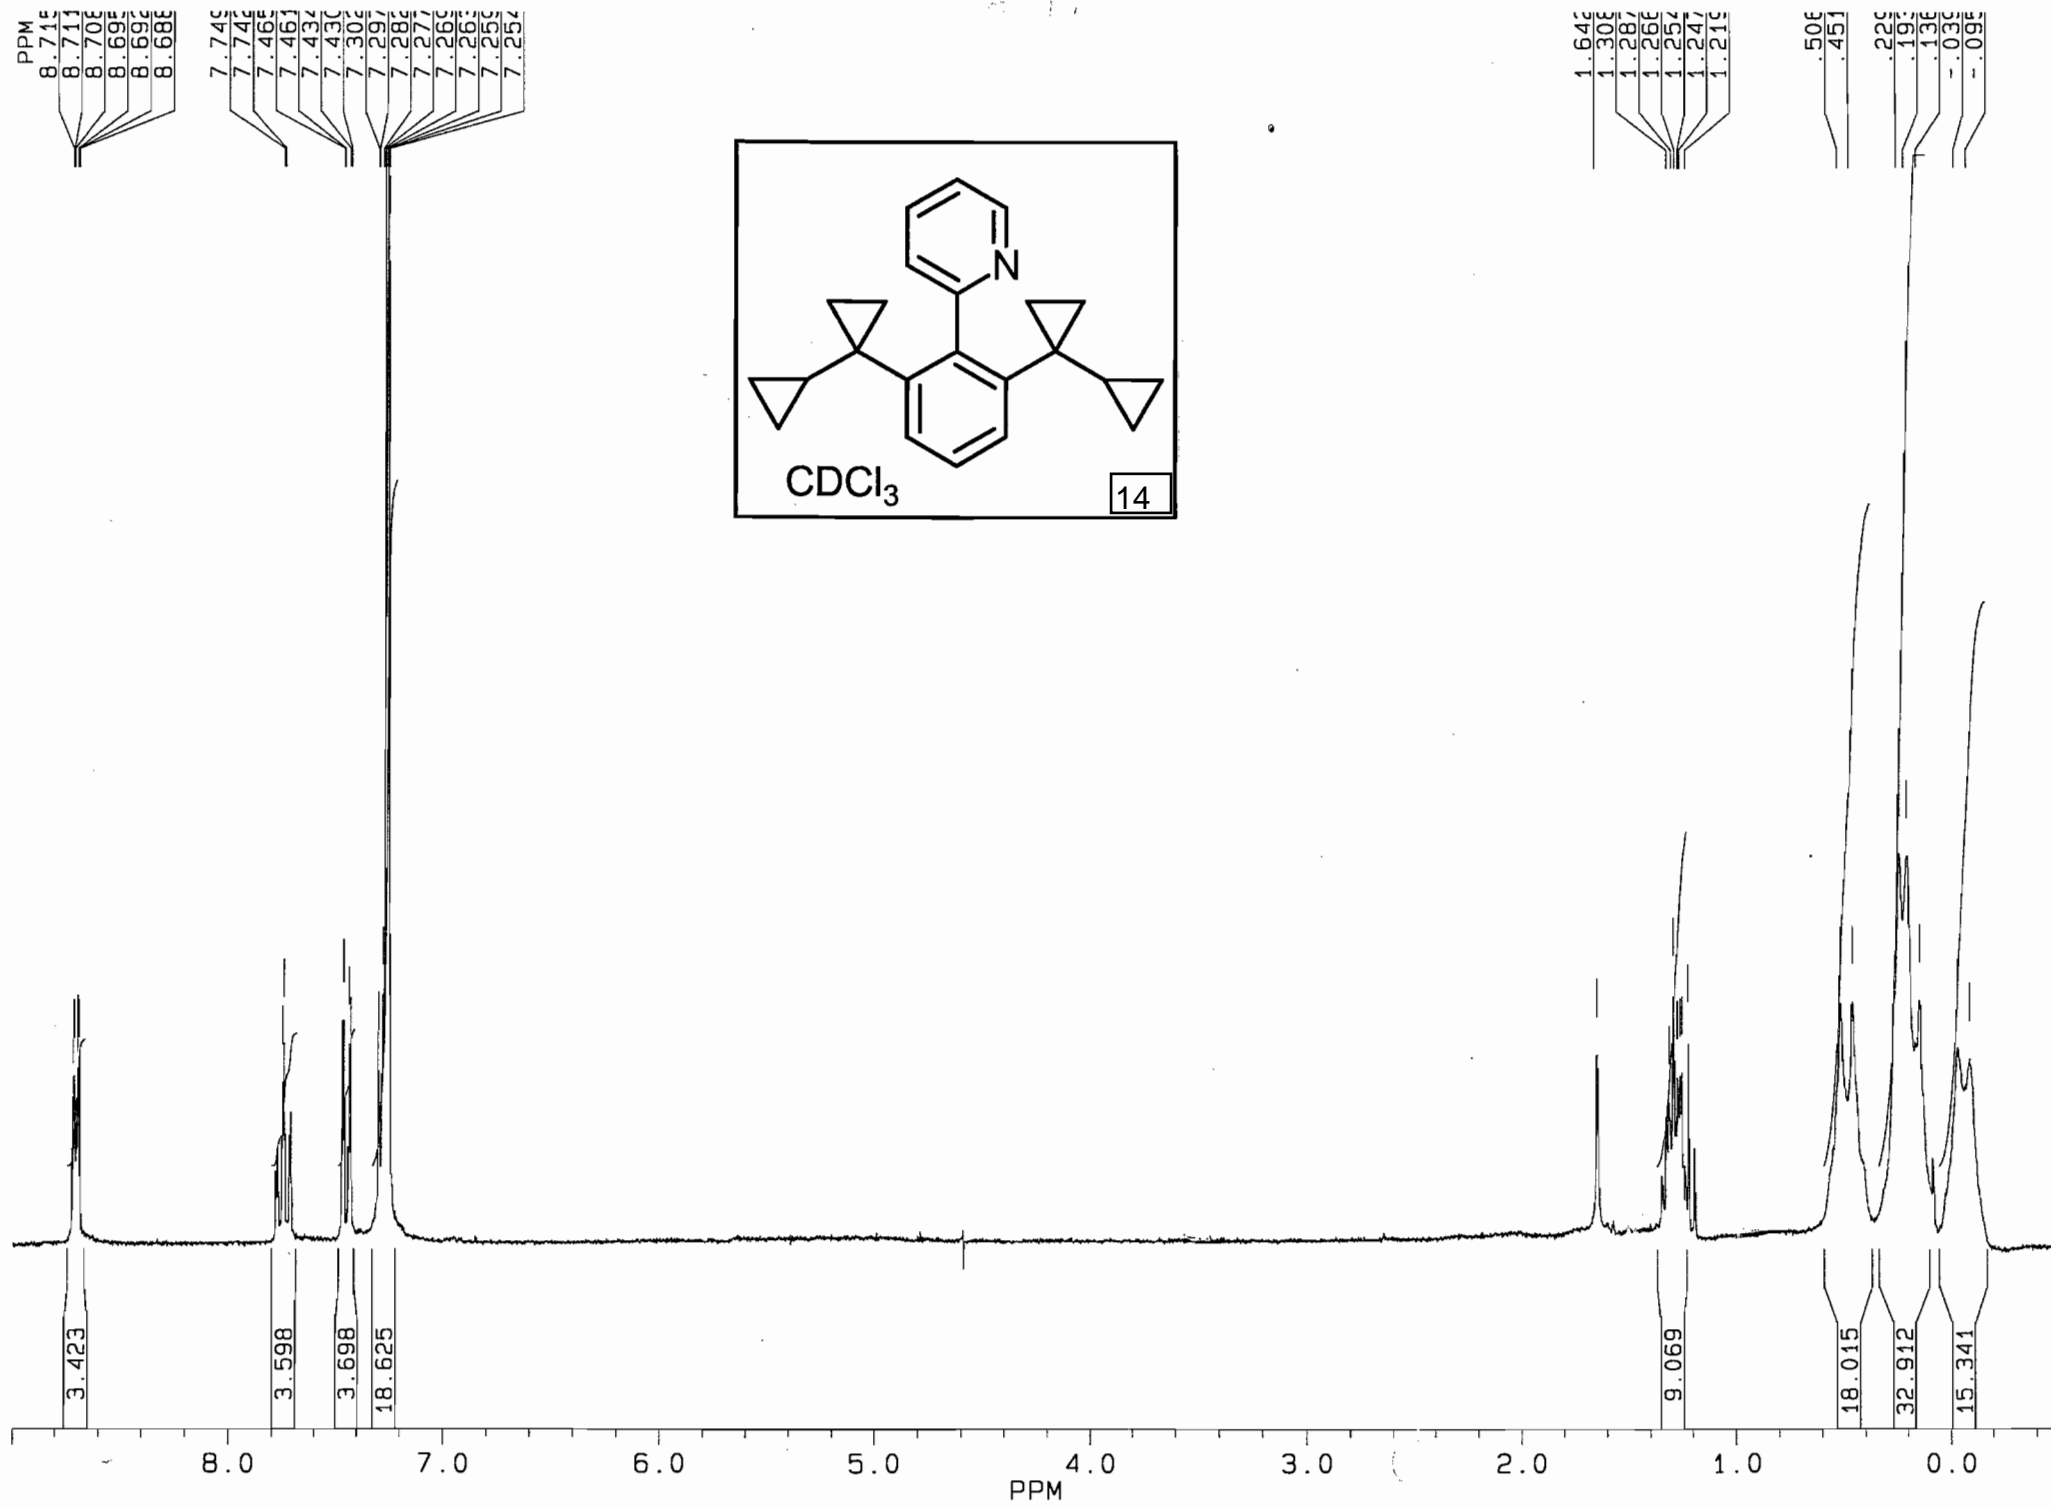

PPM

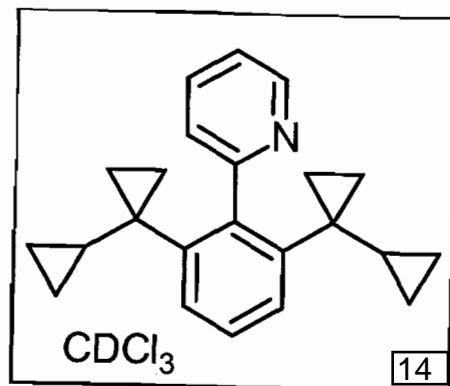

159.481

148.161

144.365

142.503

134.554

129.811

127.757

126.194

122.370

122.349

121.461

77.505

76.997

76.489

25.502

18.276

11.332

10.325

3.309

3.001

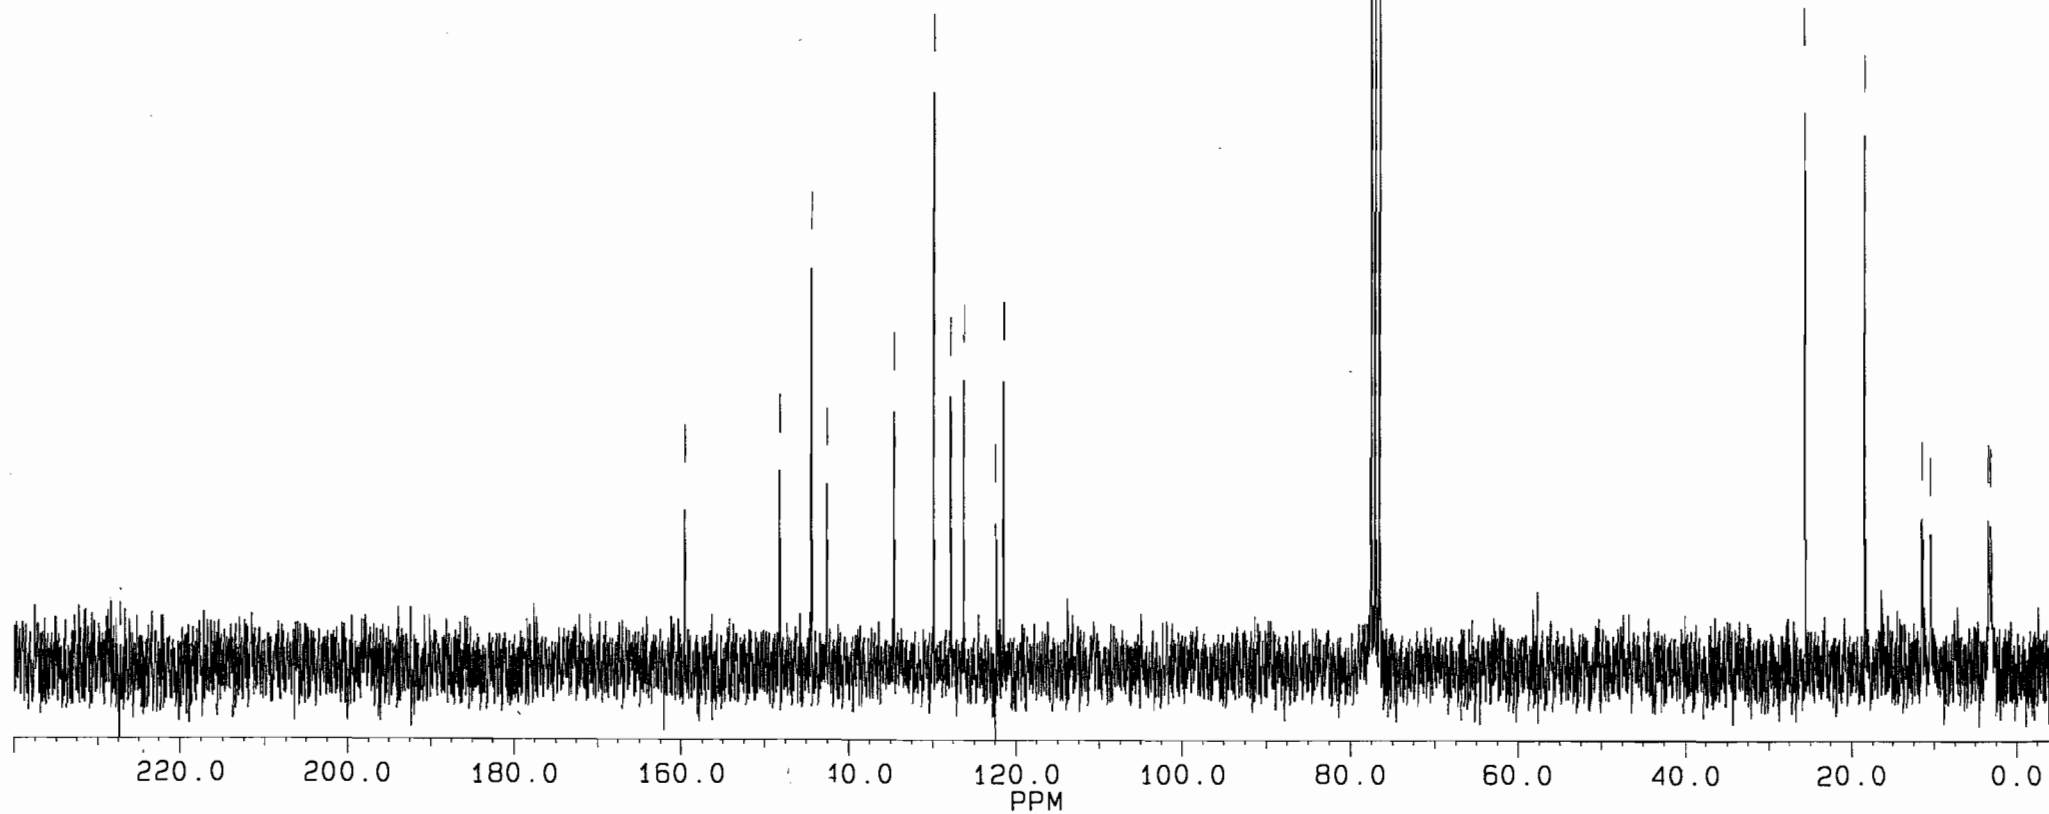

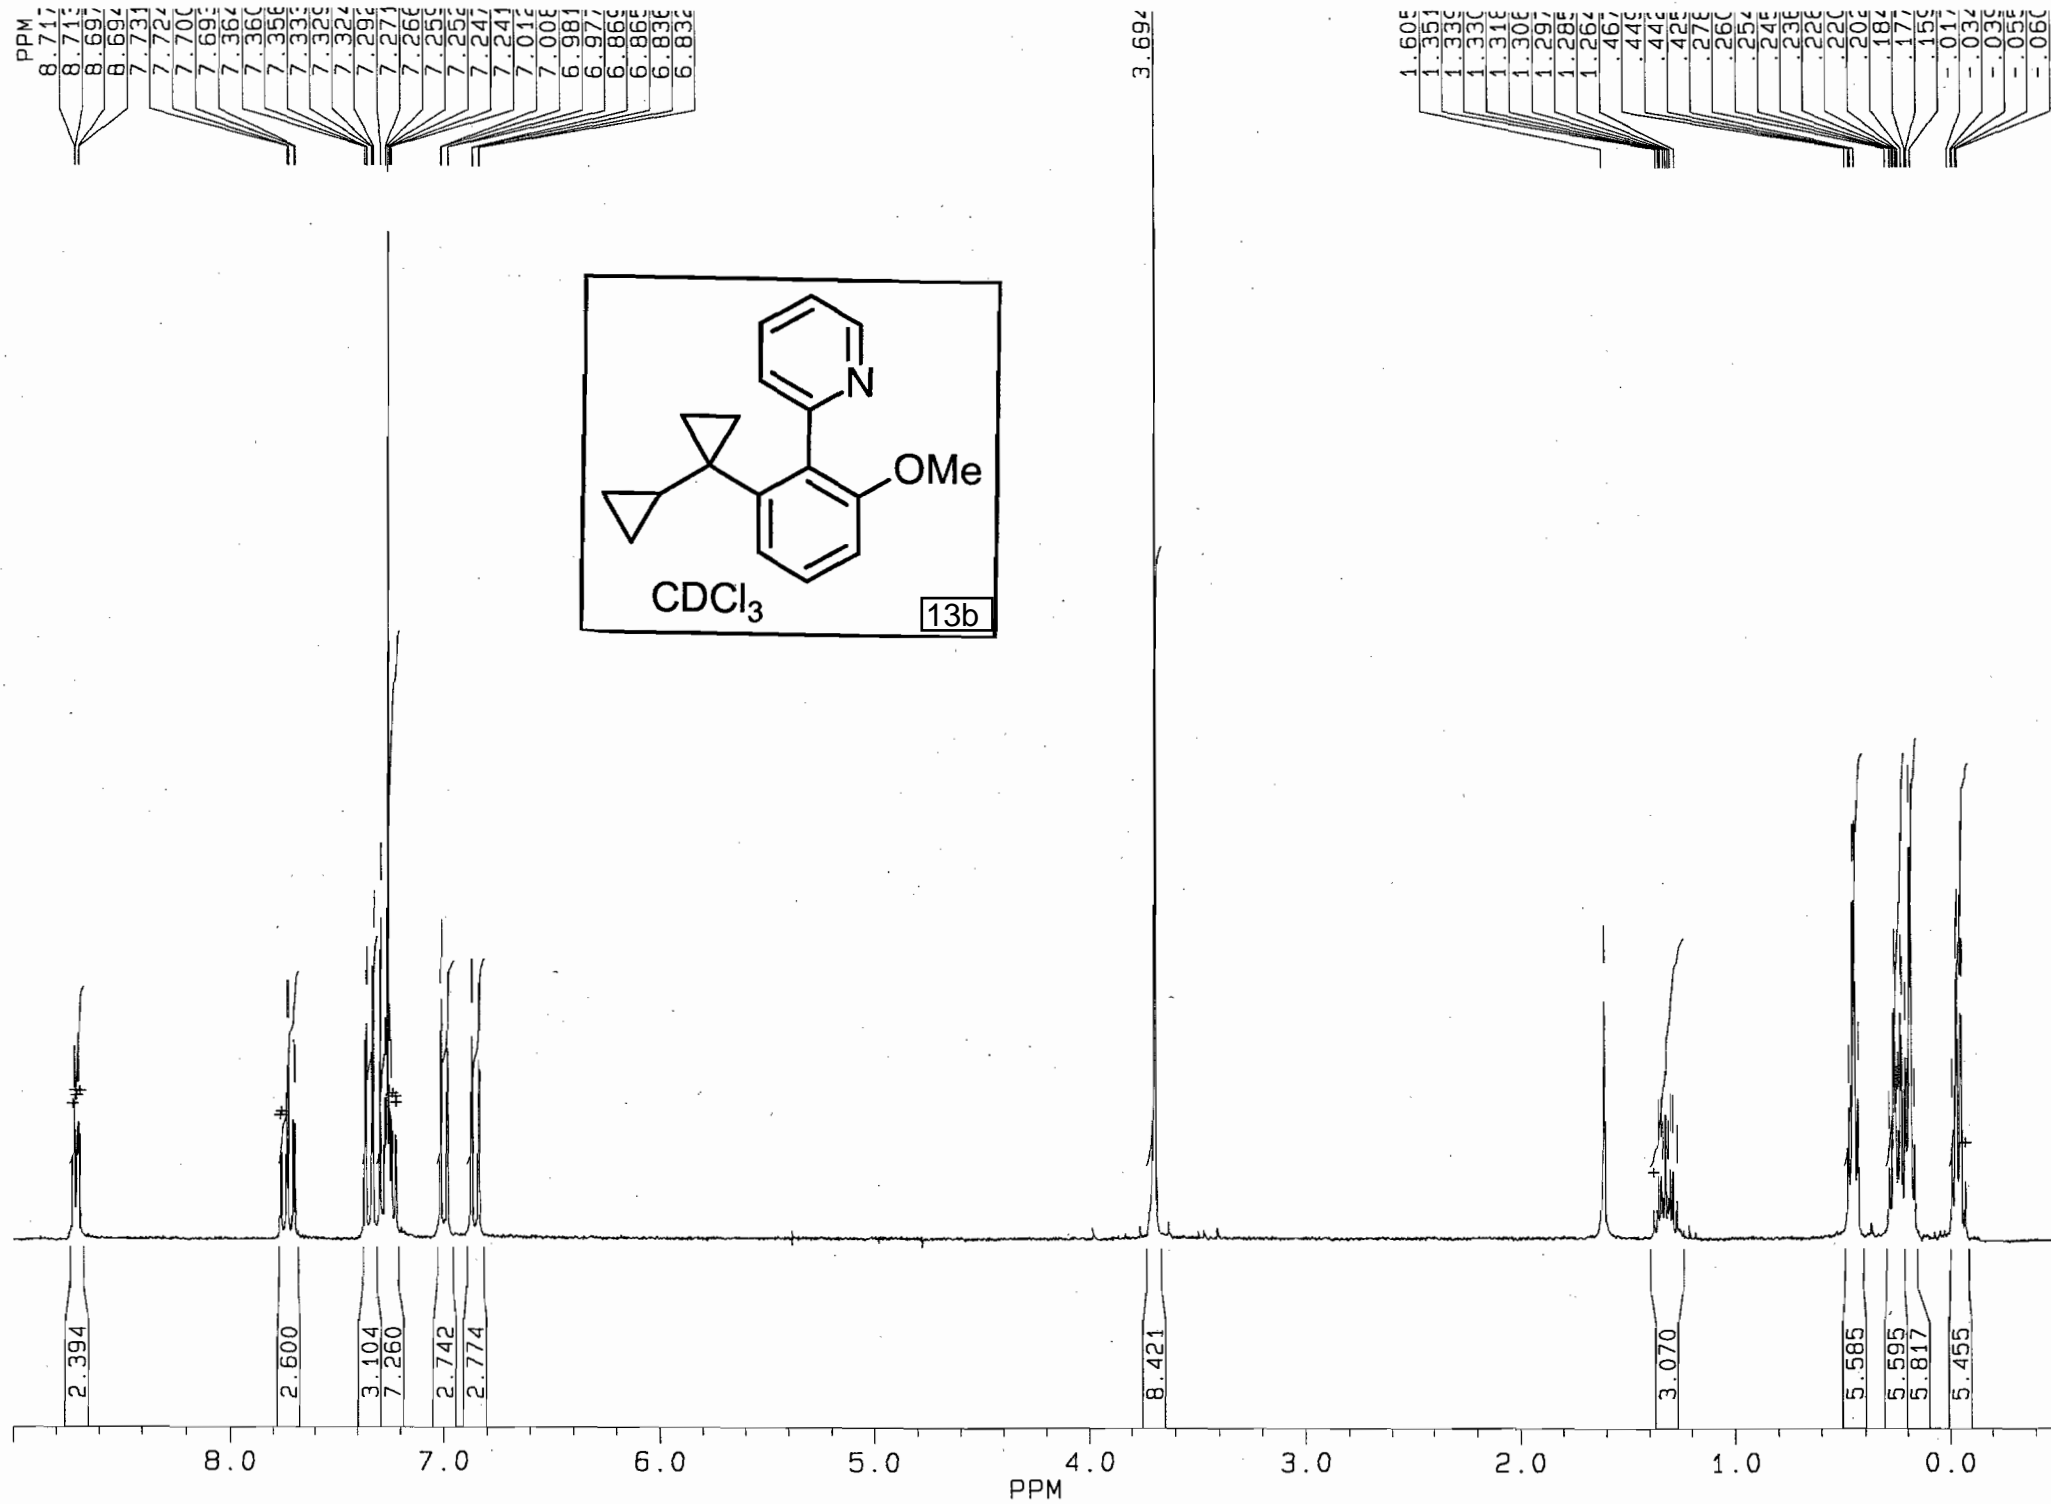

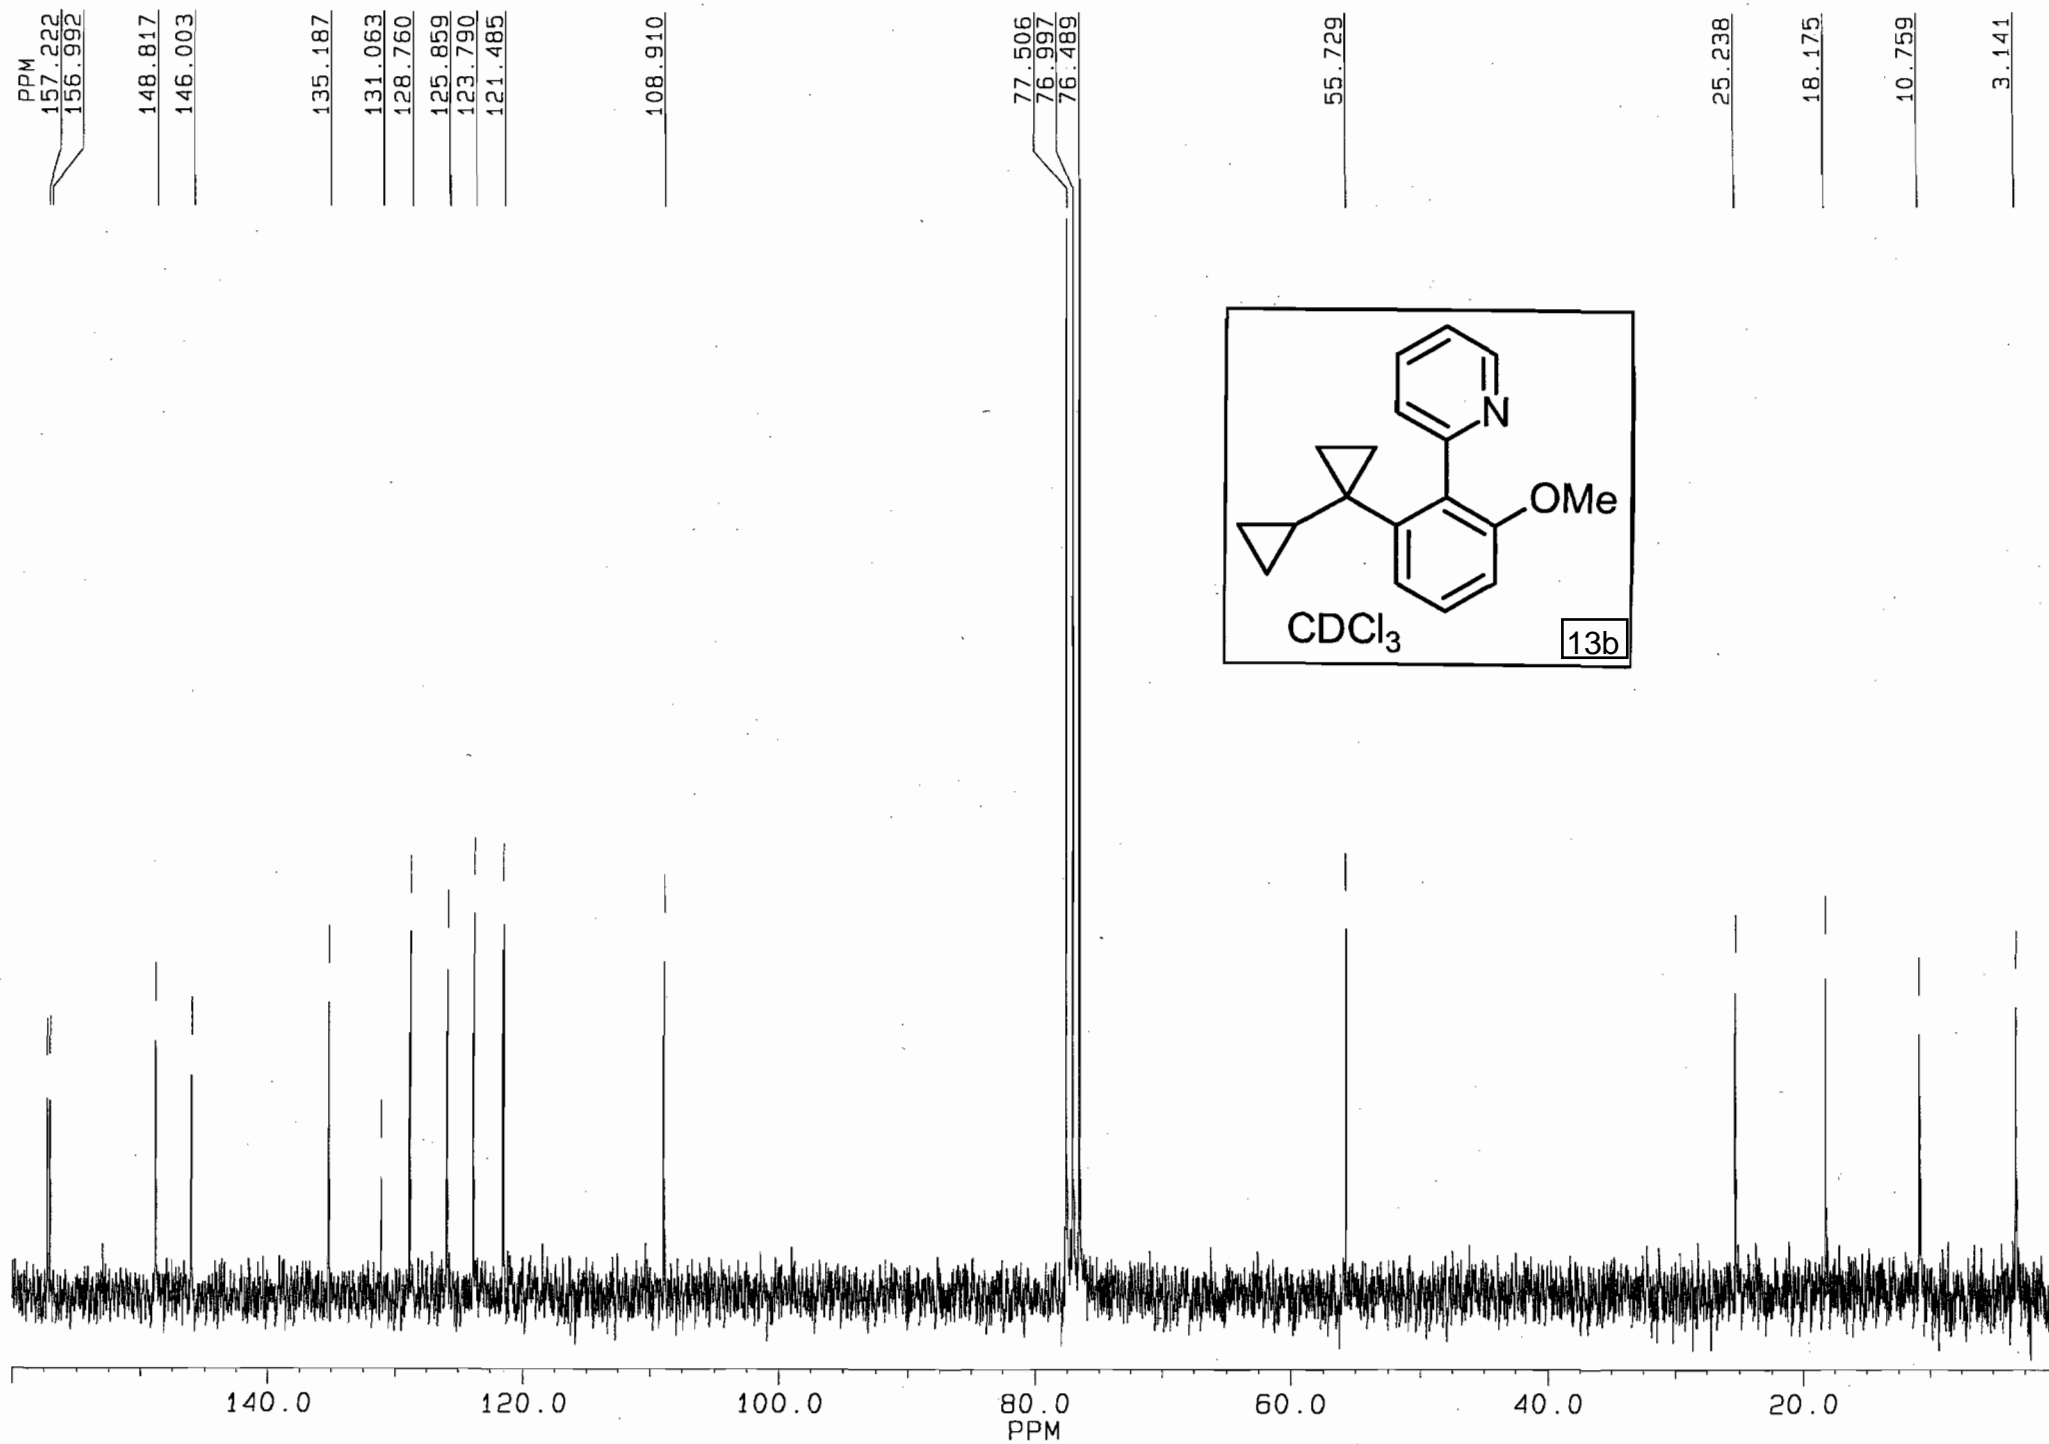

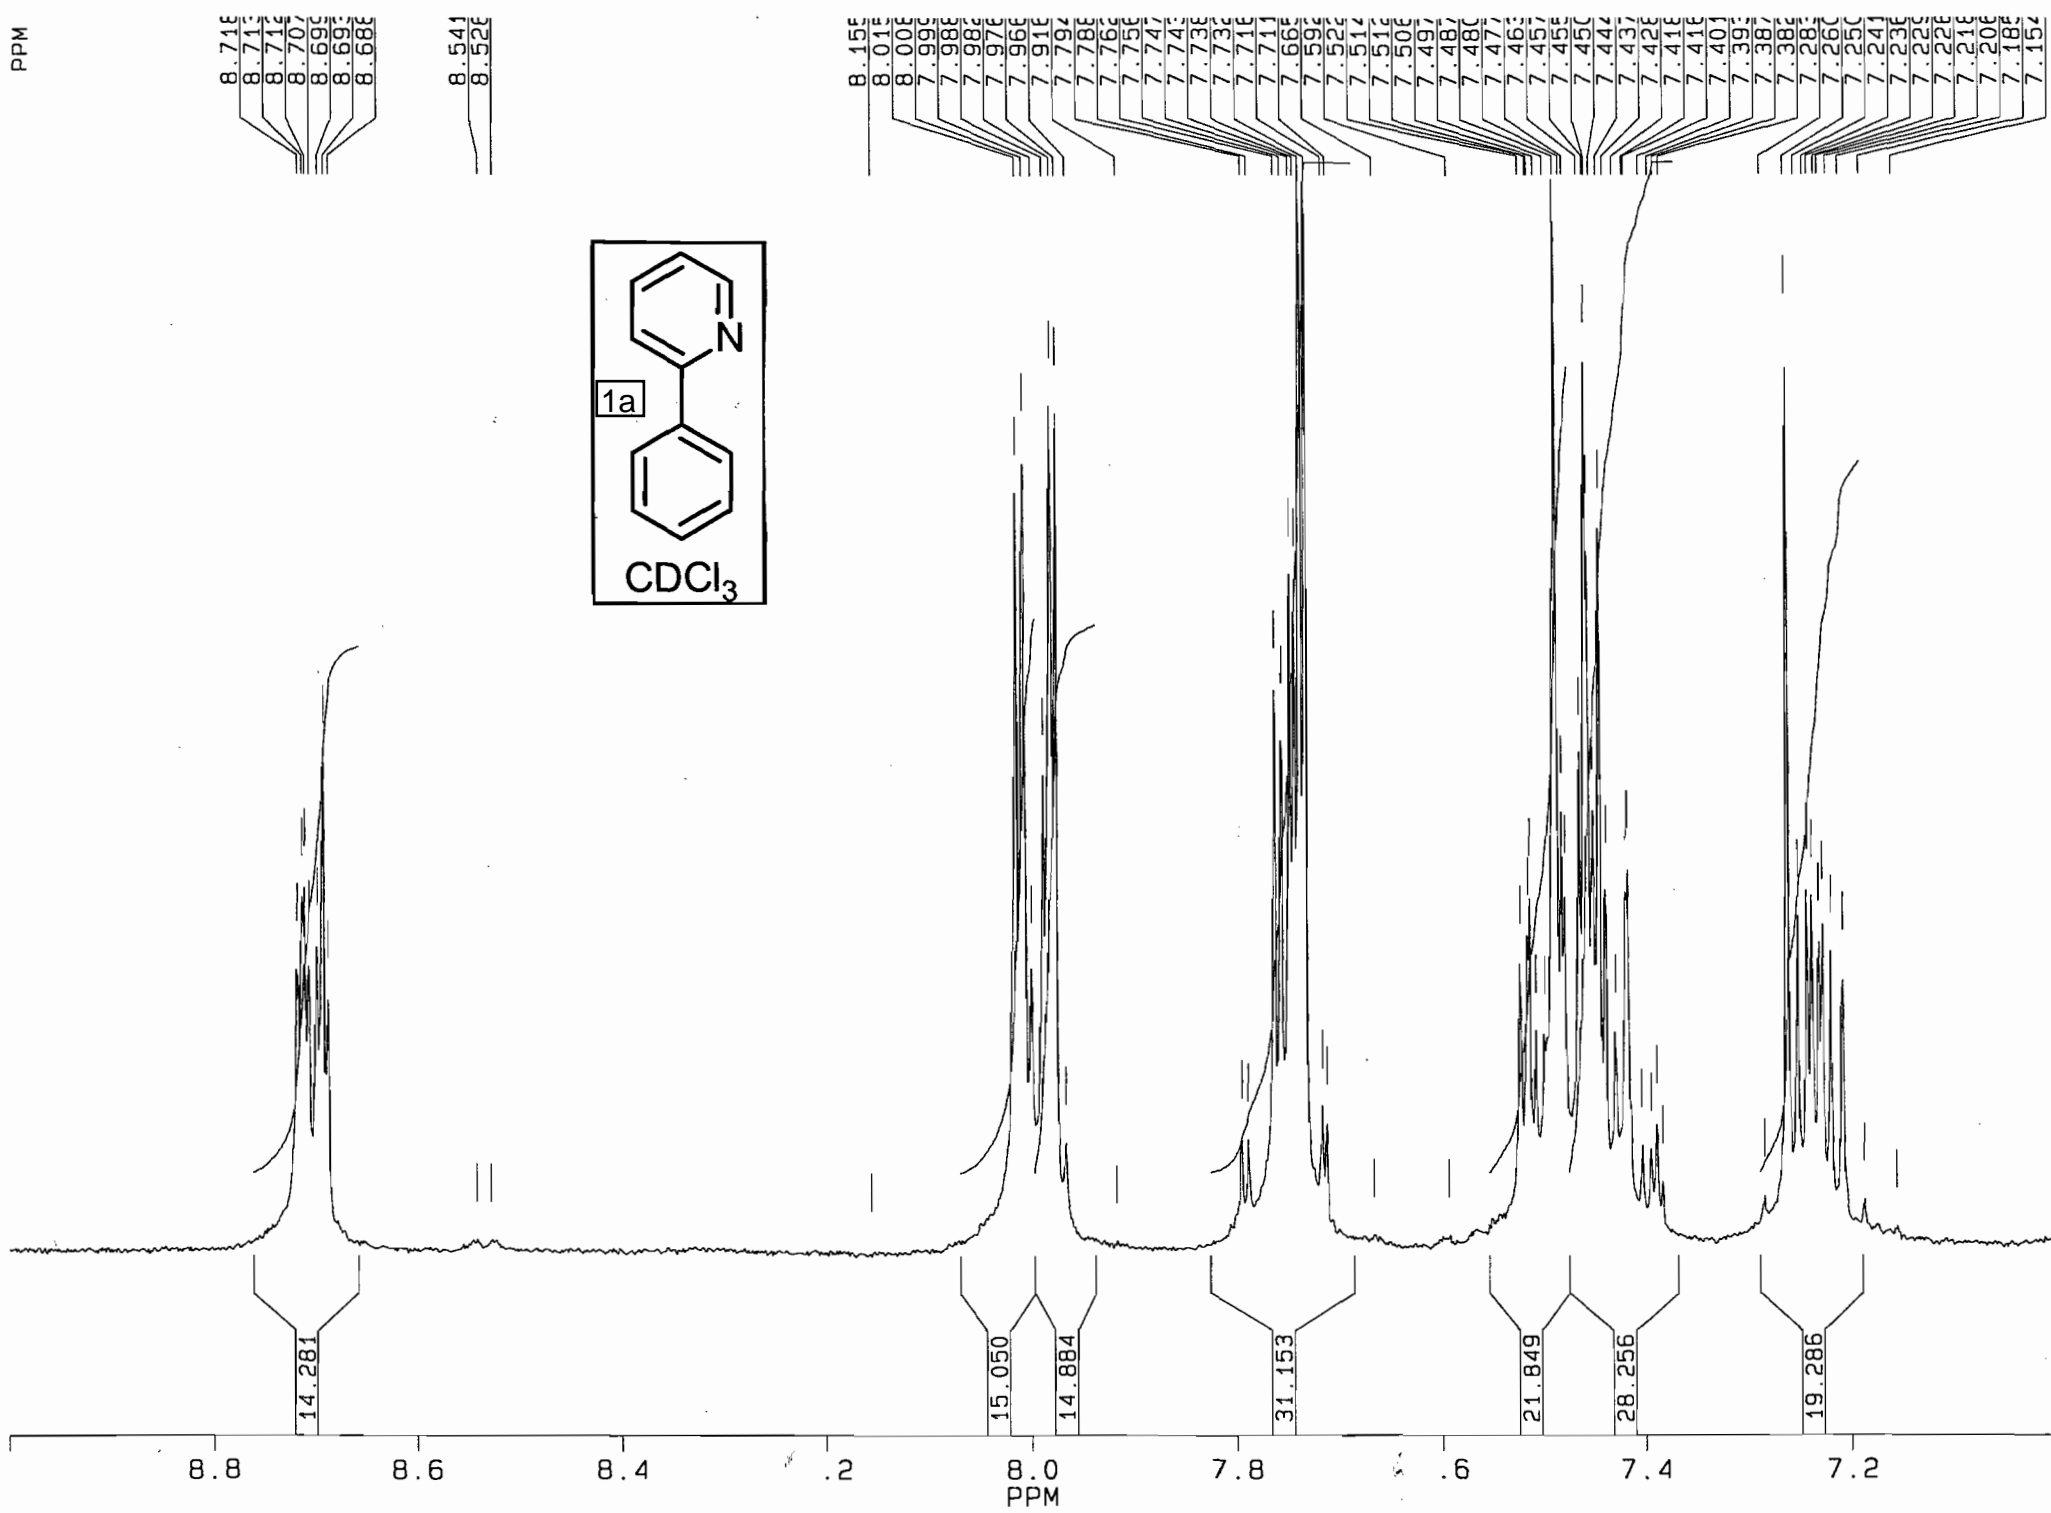



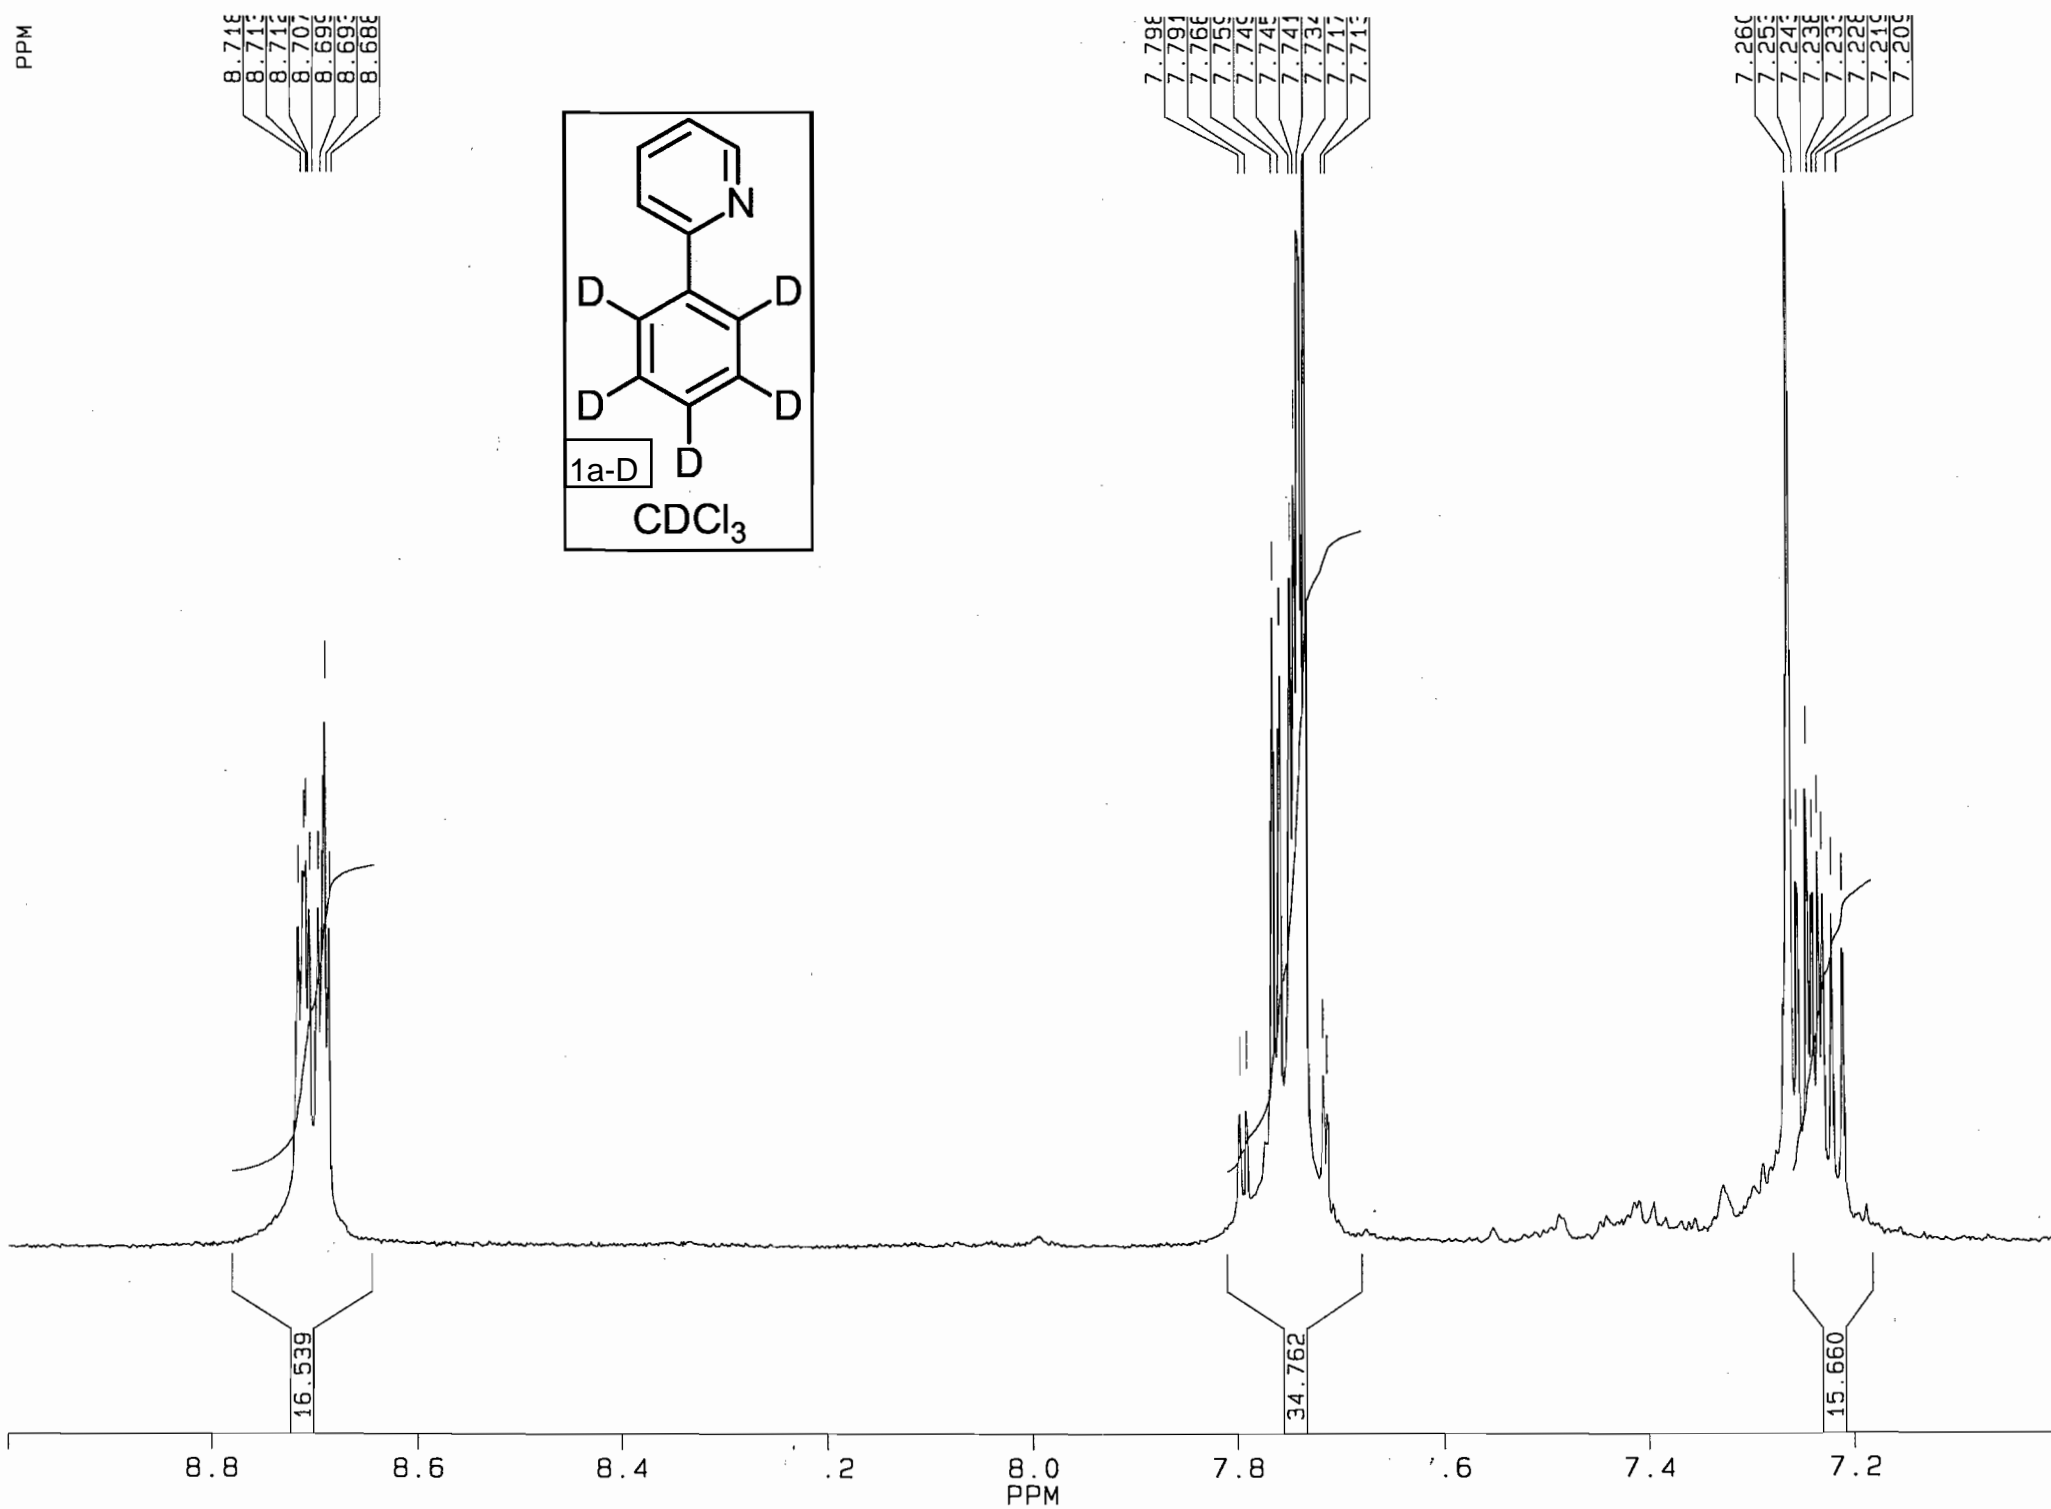

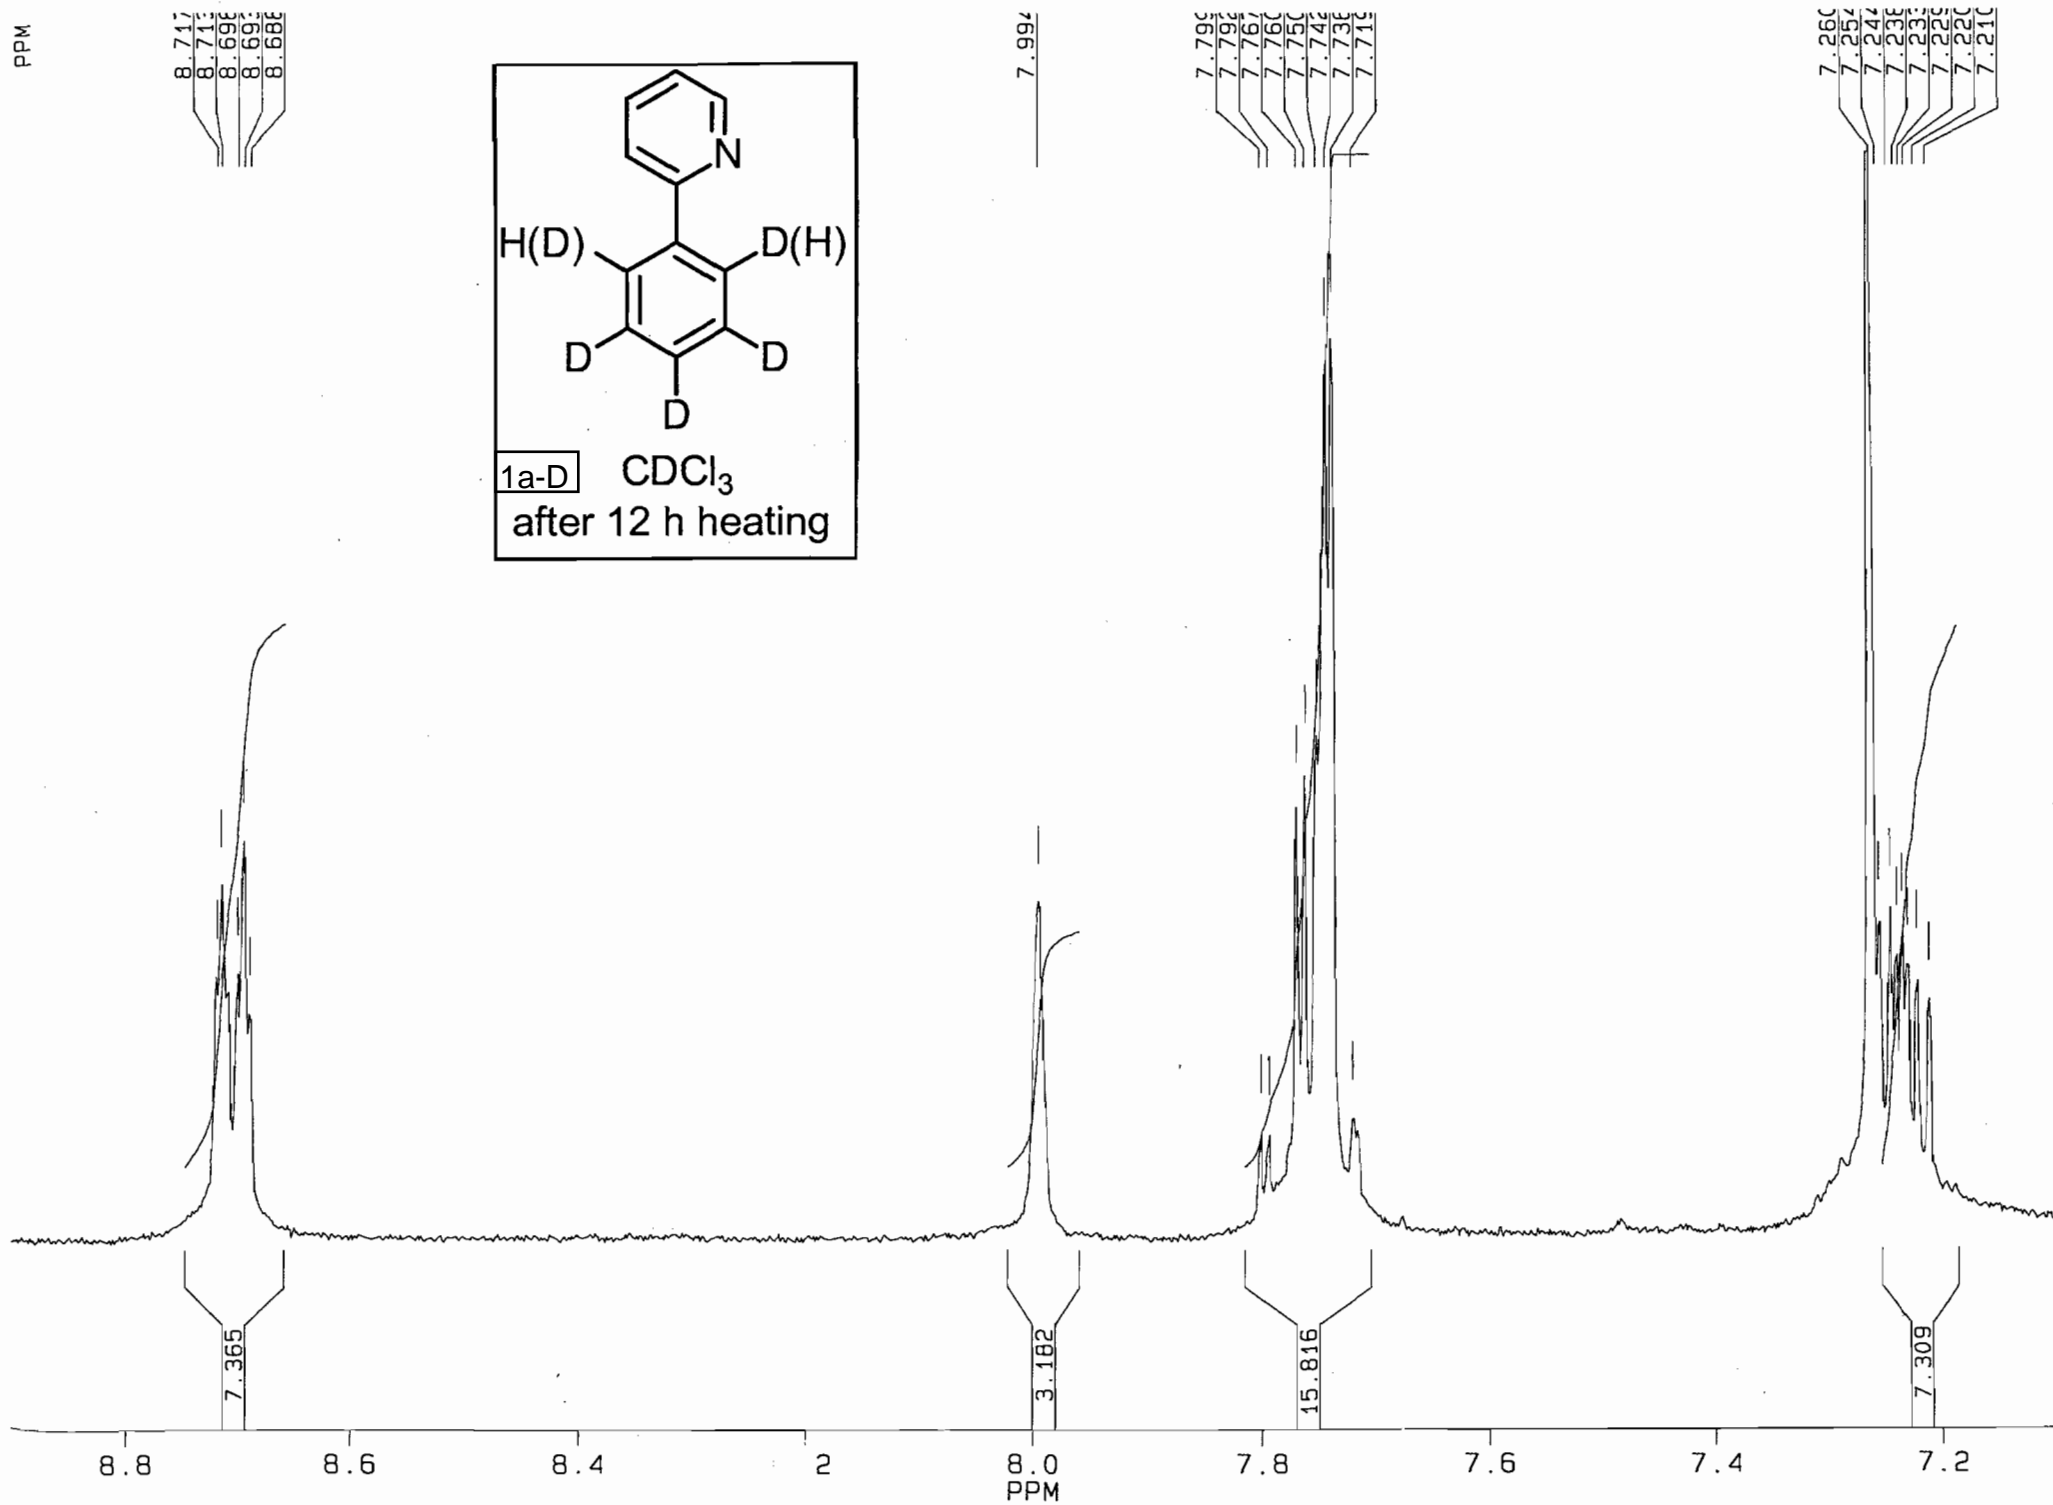

a.i.

Kozhushkov KSI-004 in MeOH

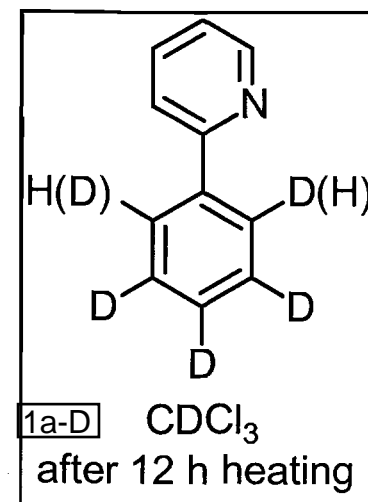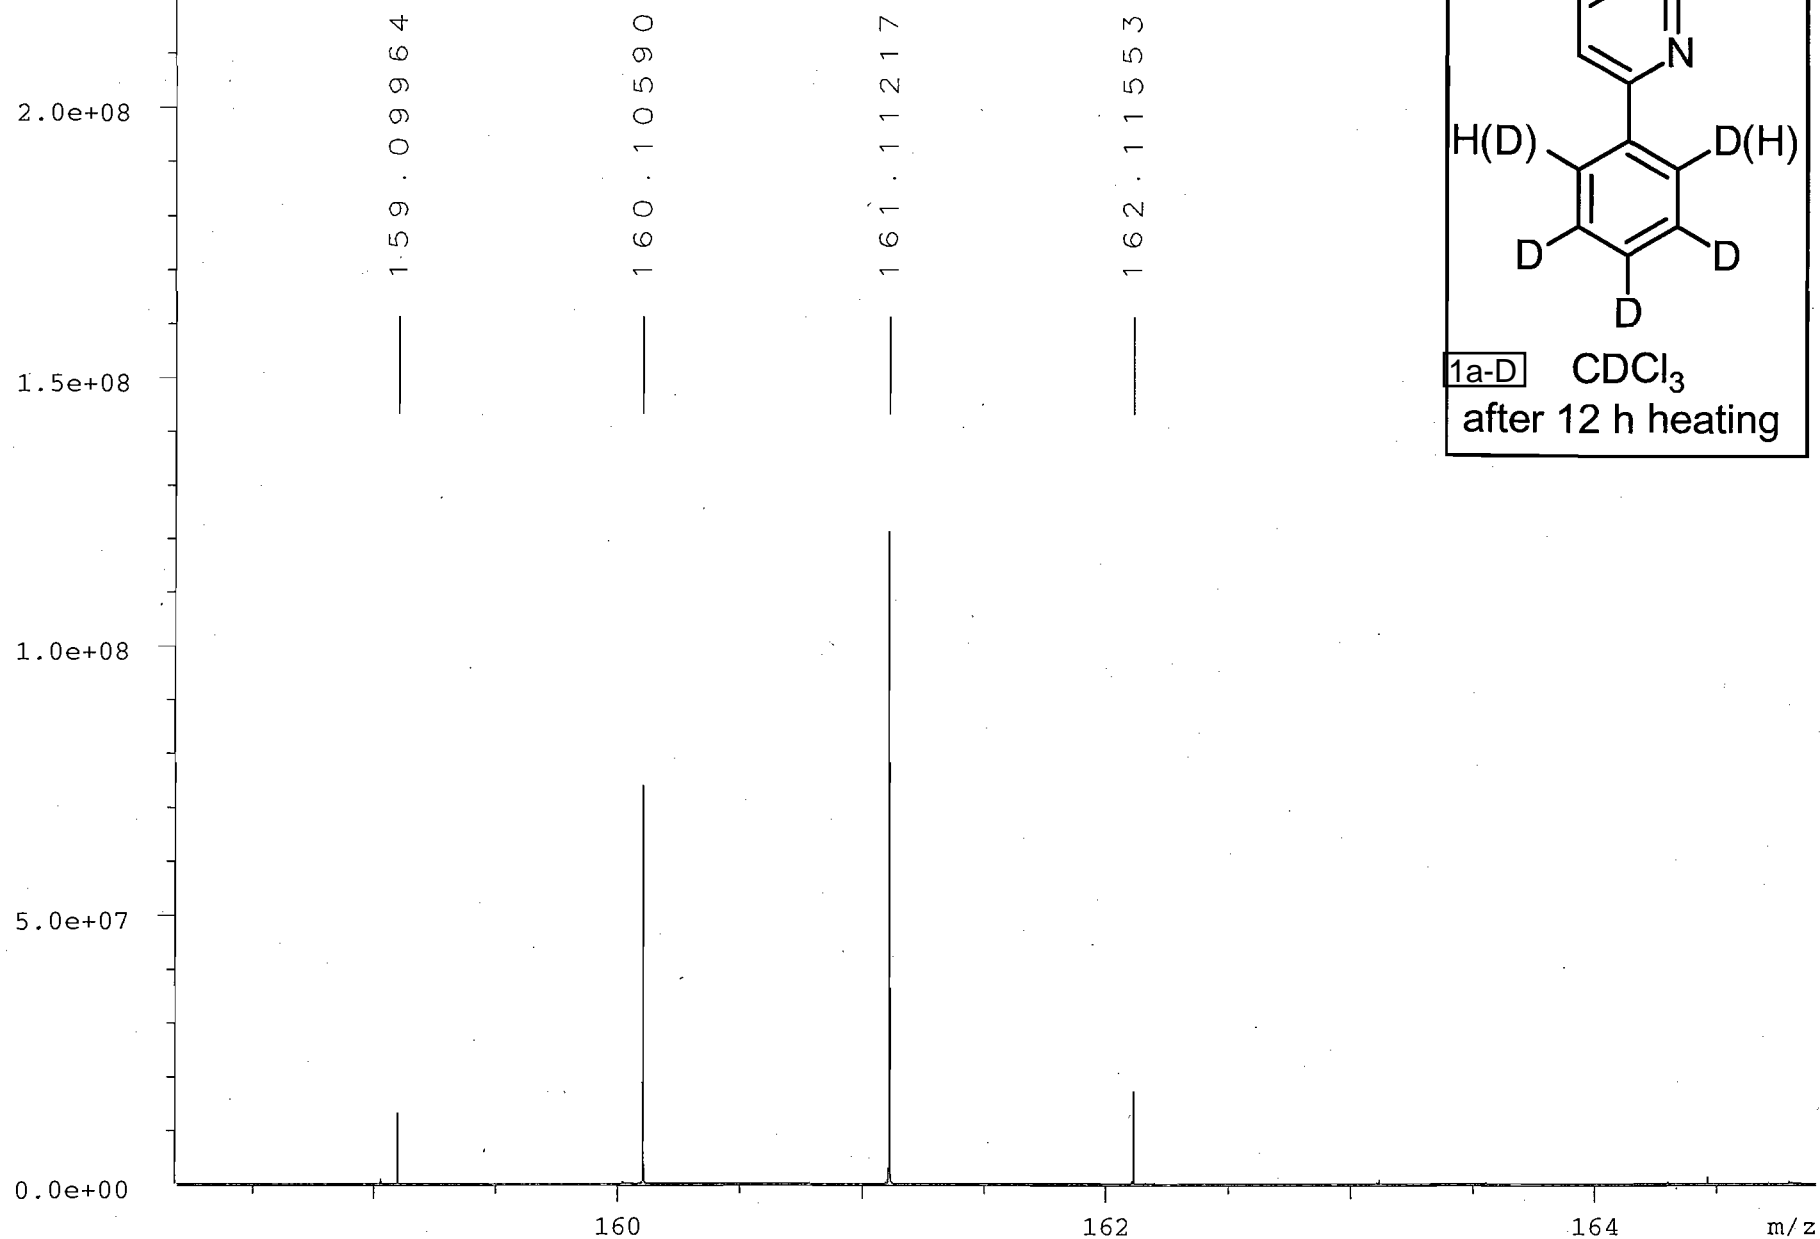

PPM

8.717  
8.712  
8.706  
8.699  
8.693  
8.687

7.993

7.799  
7.792  
7.767  
7.760  
7.750  
7.746  
7.741  
7.738  
7.718  
7.712

7.263  
7.259  
7.257  
7.247  
7.239  
7.233  
7.229  
7.220  
7.209  
7.198

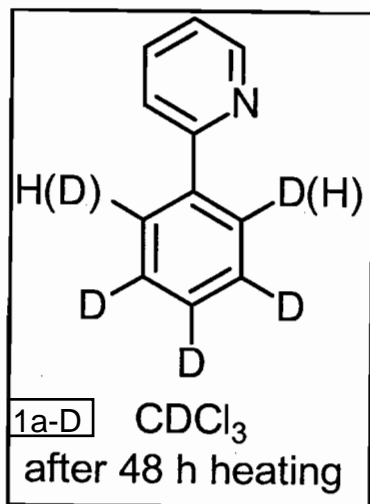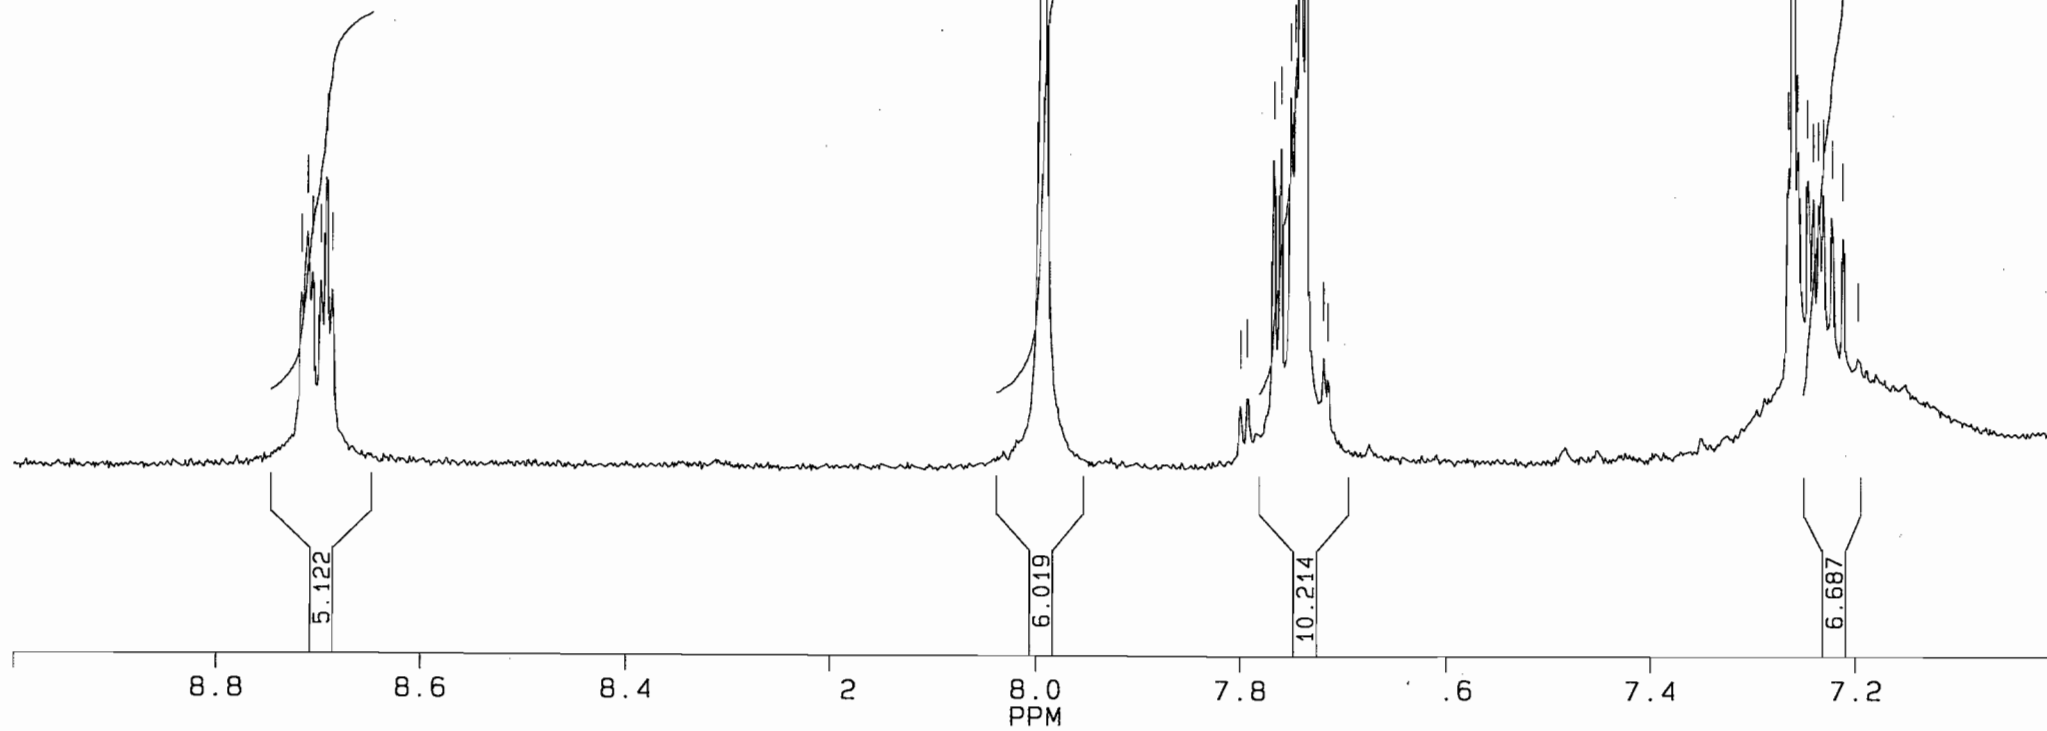

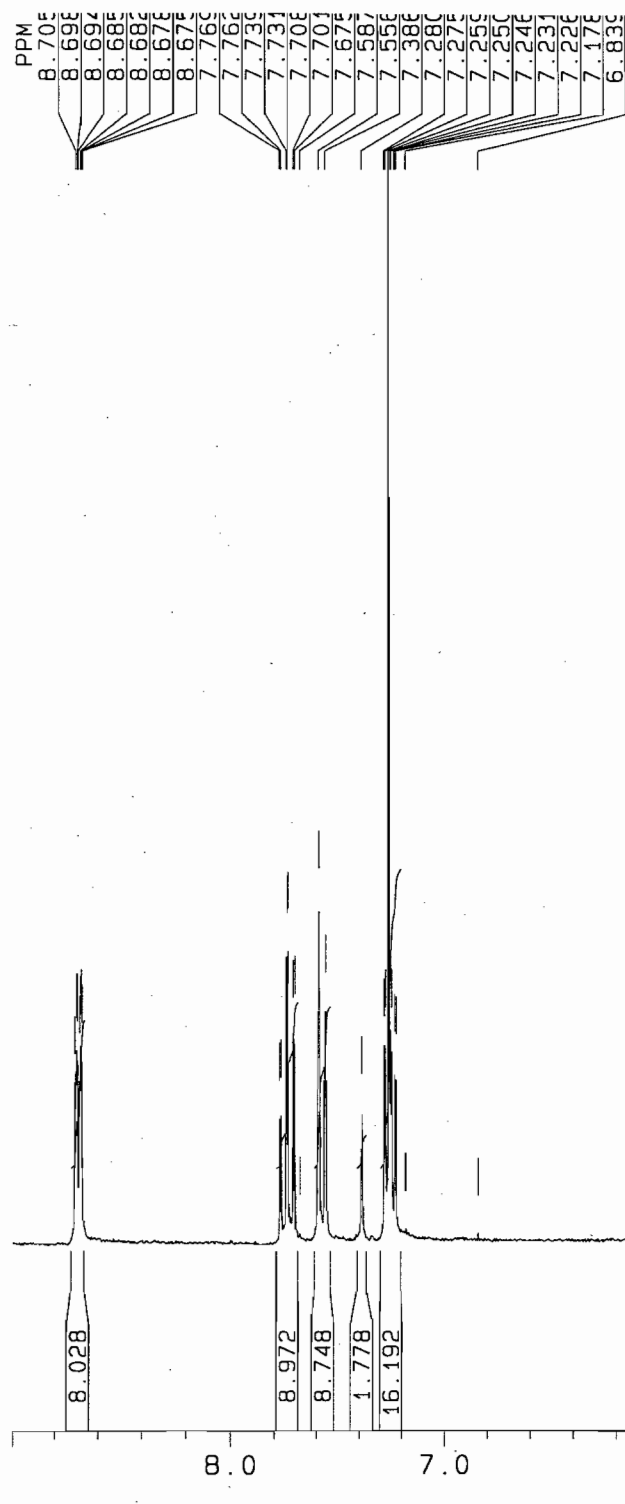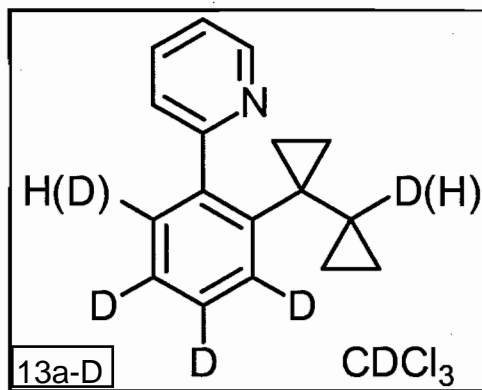

5.378

4.779

3.492  
3.465

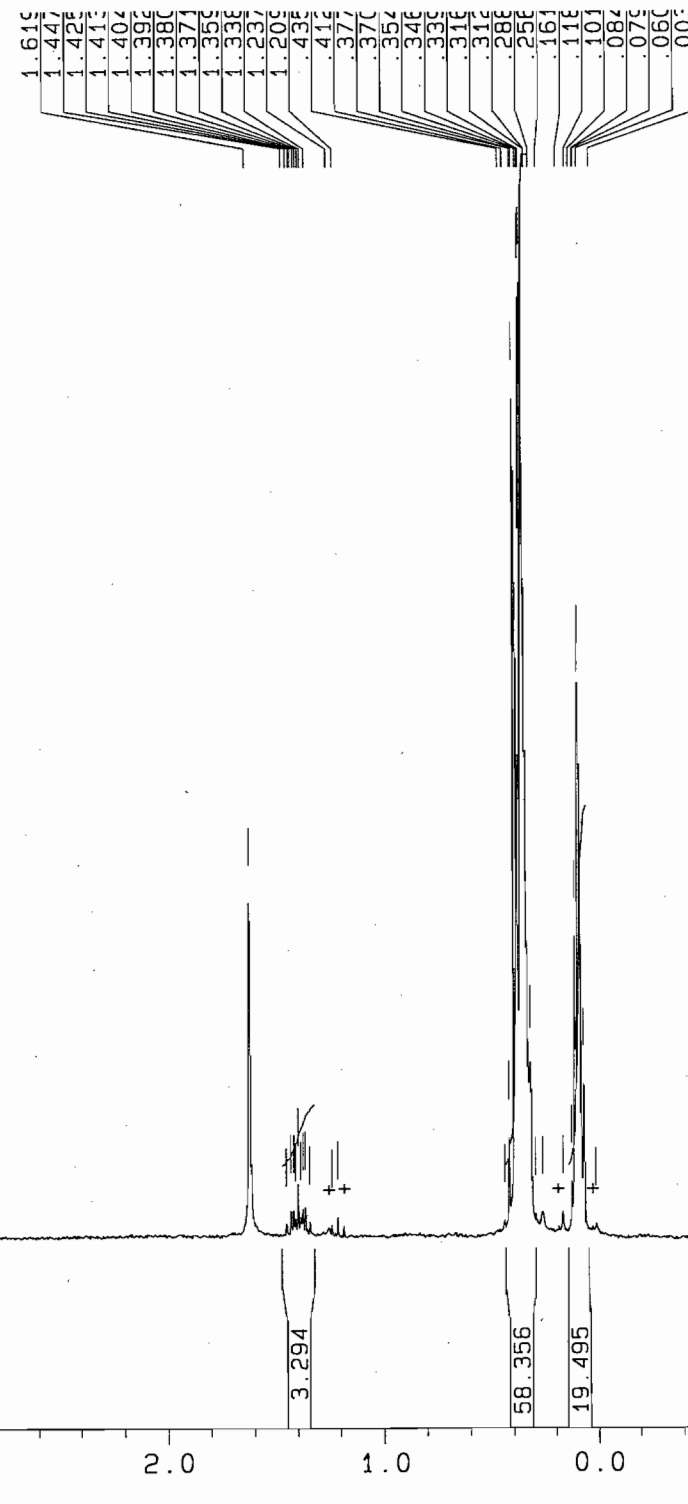

a.i.

Kozhushkov KSI-002 in MeOH

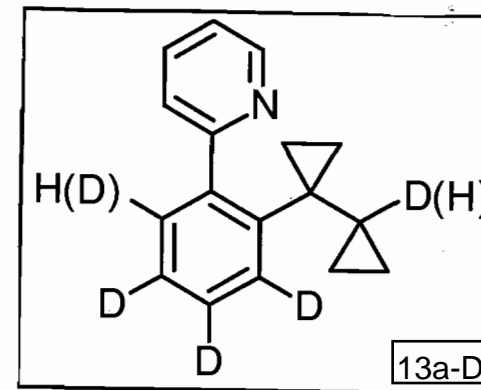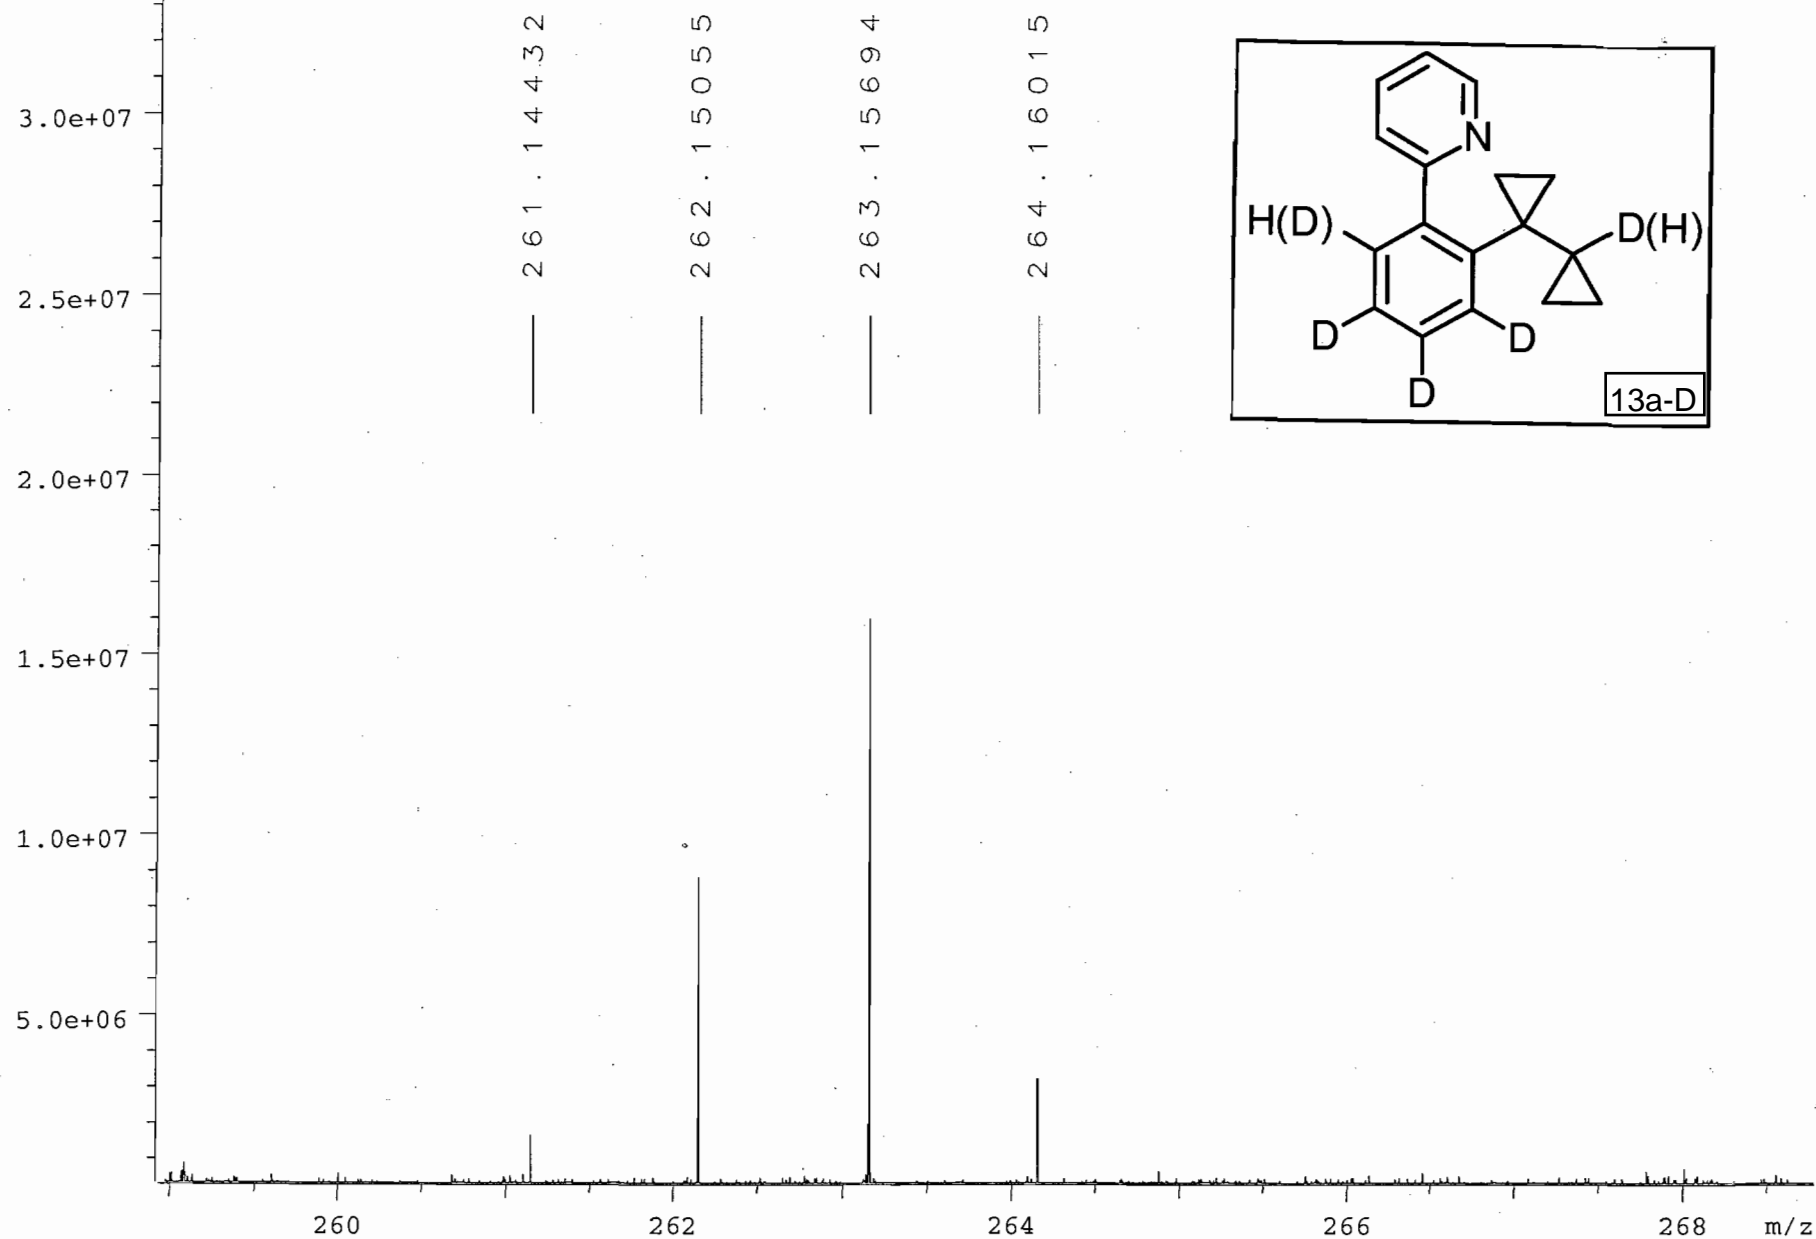

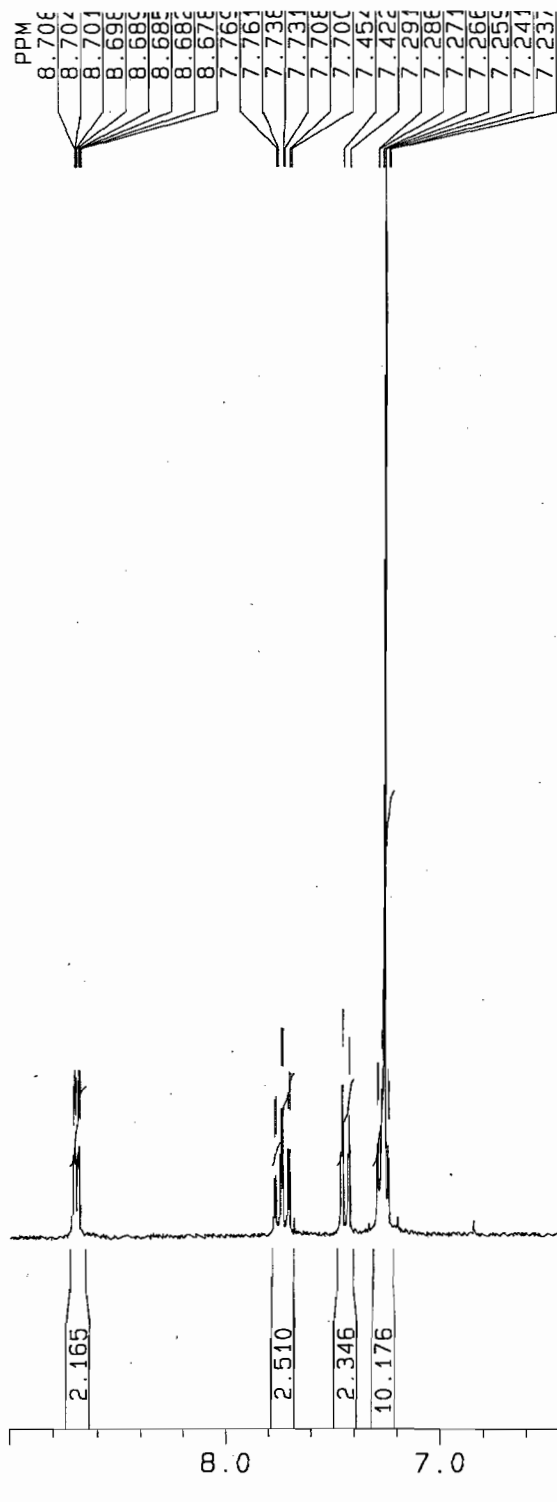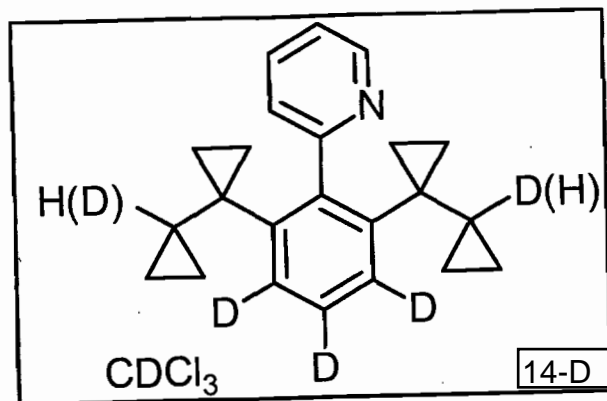

a.i.

Kozhushkov KSI-003 in MeOH

1.6e+07

1.4e+07

1.2e+07

1.0e+07

8.0e+06

6.0e+06

4.0e+06

2.0e+06

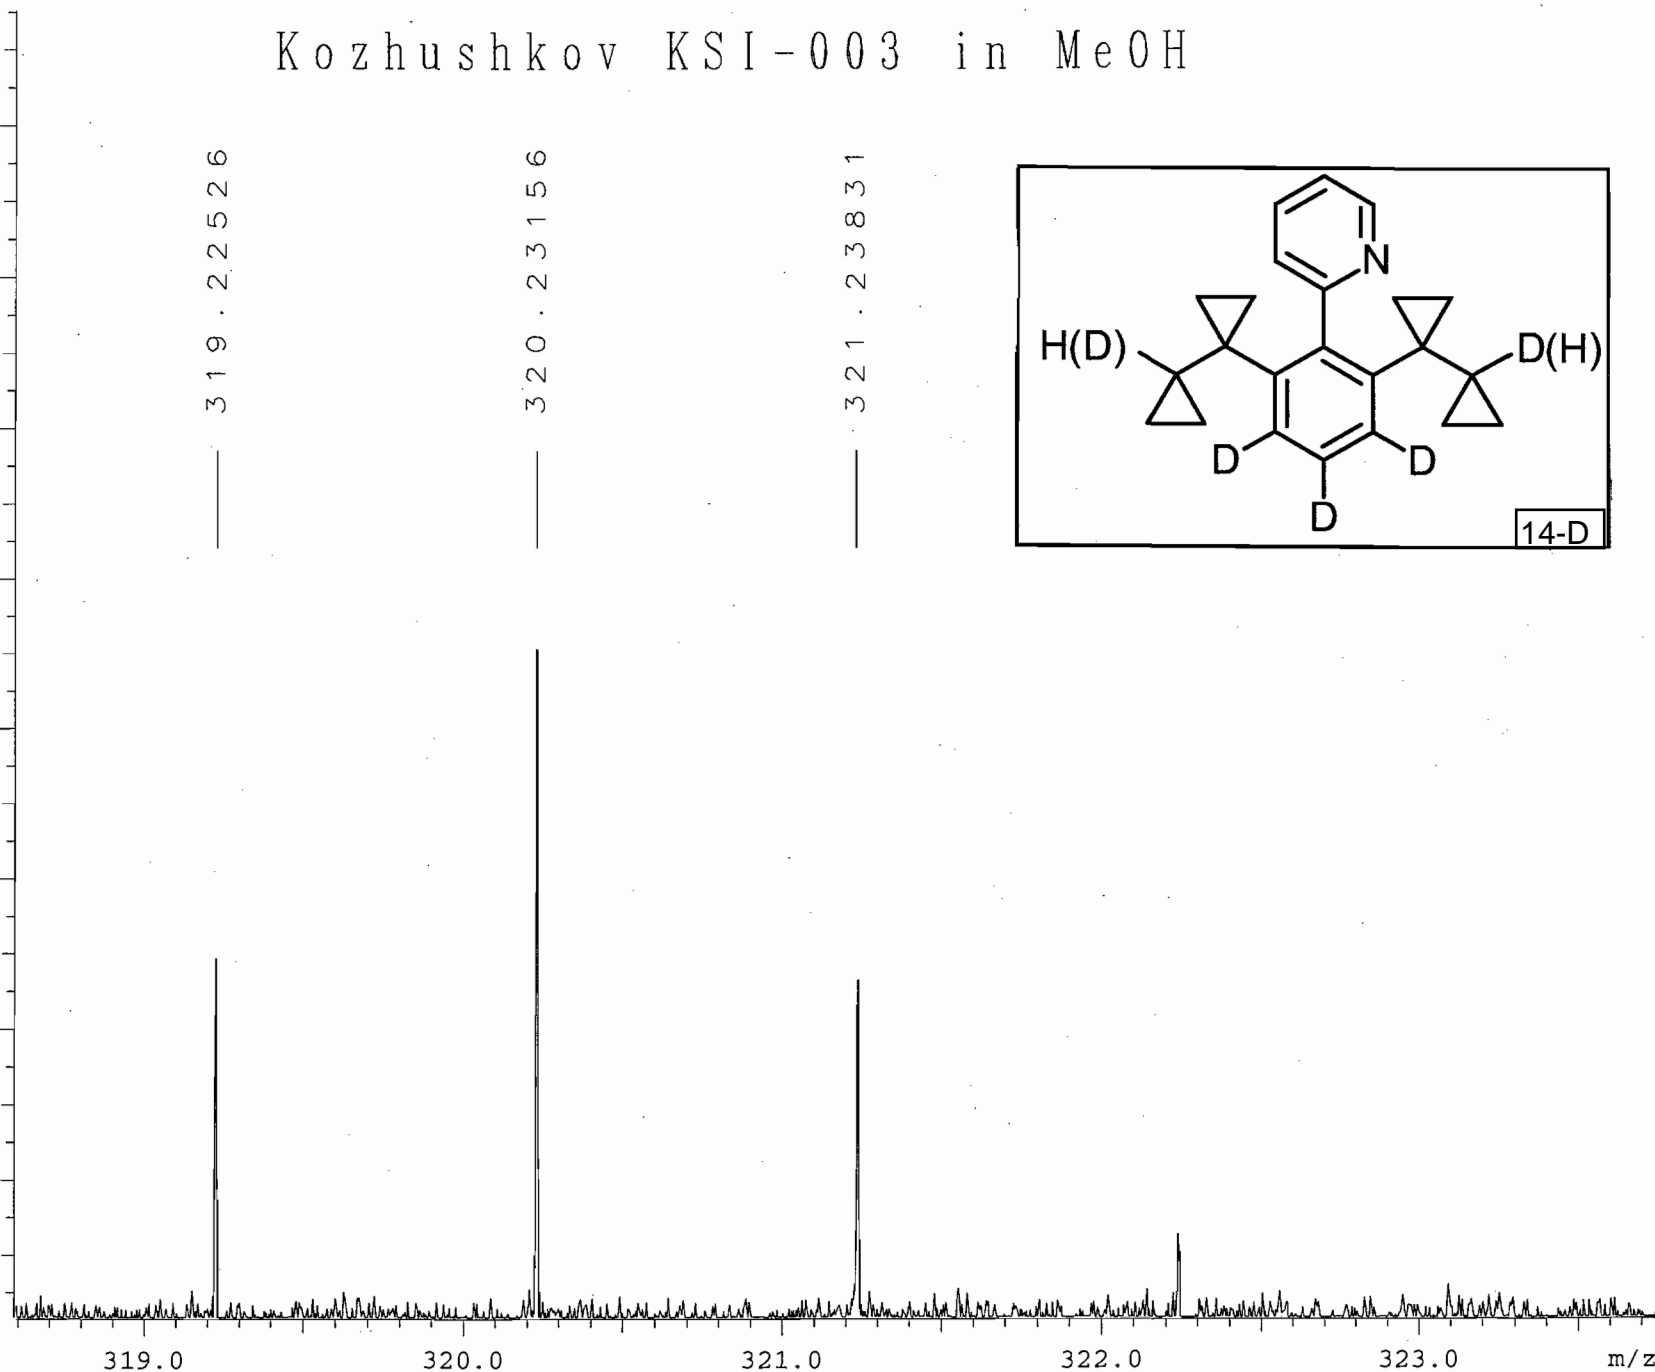



a.i.

Kozhushkov KSI-001 in MeOH

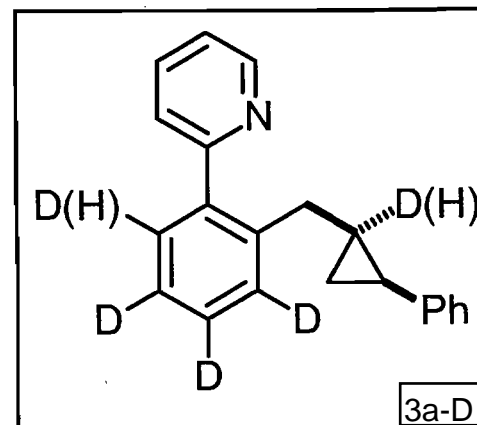

|         |   |   |   |   |
|---------|---|---|---|---|
| 1.4e+08 | 8 | 8 | 9 | 9 |
|         | 1 | 1 | 1 | 1 |
|         | 9 | 0 | 1 | 2 |
|         | 8 | 9 | 9 | 9 |
| 1.2e+08 | 2 | 2 | 2 | 2 |
|         |   |   |   |   |
|         |   |   |   |   |
| 1.0e+08 |   |   |   |   |
|         |   |   |   |   |
|         |   |   |   |   |
| 8.0e+07 |   |   |   |   |
|         |   |   |   |   |
|         |   |   |   |   |
| 6.0e+07 |   |   |   |   |
|         |   |   |   |   |
|         |   |   |   |   |
| 4.0e+07 |   |   |   |   |
|         |   |   |   |   |
|         |   |   |   |   |
| 2.0e+07 |   |   |   |   |
|         |   |   |   |   |
|         |   |   |   |   |

1.4e+08

1.2e+08

1.0e+08

8.0e+07

6.0e+07

4.0e+07

2.0e+07

290

300

310

m/z
